# Supplementary material
Source: PubMed Central journal article supplement (PMC5815000)
Supplement: jama-317-2317-s001.pdf [file jama-317-2317-s001.pdf]

## Supplementary Online Content

Gray B, Vandergrift J, Lipner RS, Green MM. Comparison of content on the American Board of Internal Medicine Maintenance of Certification Examination with conditions seen in practice by general internists. *JAMA*. doi:10.1001/jama.2017.6853

**eAppendix.** Discordance Sensitivity Descriptions

**eTable 1.** ICD-9 Codes Assigned to the 186 Conditions Categories

**eTable 2.** Distribution of Examination Question, Office Visit and Hospital Stay Percentages Across 186 Medical Conditions

**eTable 3.** Examination Question Counts, Sample Sizes and Estimates for Office Visits, and Hospital Stays for the 186 Condition Categories

**eTable 4.** Discordance Sensitivity Results

This supplementary material has been provided by the authors to give readers additional information about their work.

## **eAppendix. Discordance Sensitivity Descriptions**

Five concordance sensitivities were examined. The first two sensitivities considered the upper and lower 95% confidence bounds of the 0.5-SD threshold. The lower 95% confidence interval bounds criteria was <0.67% for office visits and <0.46% for hospital stays. The upper 95% confidence interval bounds criteria was <0.83% for office visits and <0.57% for hospital stays. Third, a “care setting” sensitivity considered that some general internists spend no time in the hospital setting. Seventy two percent (72.3%) of 15,783 clinically active general internists who completed ABIM’s practice characteristics survey as part of their MOC registration during the study period spent time caring for patients in the hospital. For this sensitivity, the percent concordant was set to 72.3% (rather than multiplied by 100%) if a condition category was considered congruent with the hospital stays percentage but discordant with the office visits percentage. One minus this number was used to compute the percent discordant. Fourth, the “Hospital stay data periodicity sensitivity” considered the sensitivity of only including 2010 NCHDS data rather than data from the full 2010 to 2013 sample period. In this sensitivity, the 2010 NHDS data was replaced by NHDS data from 2007 to 2010. Five, the “non-surgical stay” sensitivity excluded hospital stays invasive surgical procedures. After these procedures were excluded, the hospital data included an estimated 19,489,702 admissions compared to 26,915,838 in the base case. These procedures were identified using the Surgery Flag Software Version 2 produced by the Healthcare Cost and Utilization Project (HCUP) (see <https://www.hcup-us.ahrq.gov/toolssoftware/surgflags> for software and documentation).

**eTable 1. ICD-9 Codes Assigned to the 186 Condition Categories**

| <b>Condition Category</b>                                        | <b>ICD-9's</b>                                                                               |
|------------------------------------------------------------------|----------------------------------------------------------------------------------------------|
| Acne or Rosacea                                                  | 695.3, 706.1-706.0                                                                           |
| Acute renal failure                                              | 584, v56, v45.1, 572.4, 728.88, 445                                                          |
| Adrenal disorders                                                | 255.1-255.9, 759.1, 227.0                                                                    |
| Adult respiratory distress syndrome                              | 518.82, 518.83, 518.84, 958.1, 518.7                                                         |
| Adverse effects of cancer chemotherapy                           | 285.3, 277.88                                                                                |
| AIDS and HIV infection                                           | 042 - 044, v08                                                                               |
| Allergic complications of transfusions                           | 279.5, 999.41, 999.51, 999.6, 999.7, 999.80, 999.83-999.885, 999.89                          |
| Alopecia                                                         | 704.0                                                                                        |
| Anaphylaxis                                                      | 995.0, v13.81                                                                                |
| Anterior pituitary disorders                                     | 253.0-253.4, 253.7, 255.0, 237.0                                                             |
| Anxiety disorders                                                | 293.84, 300.0, 300.2, 300.3, 309.81, 308, 309.21, v11.4                                      |
| Assorted endocrine tumors and endocrine manifestations of tumors | 157.4, 209, 193, 194, 226, 227.1-227.9, 237.1-237.4, 259.2, 198.7, v10.87, v10.88, 239.7     |
| Asthma                                                           | 493                                                                                          |
| Autoimmune systemic disorders, including IgG4-related disorders  | 279.4, 995.93, 995.94, 995.90                                                                |
| Bacteremia or sepsis syndrome                                    | 995.91, 995.92, 790.7, 449, 040.82, 333.92                                                   |
| Biliary tract disease                                            | 574, 575, 576                                                                                |
| Bone marrow transplantation (late complications only)            | v42.81, v42.82                                                                               |
| Bone tumors                                                      | 170, 238.0, v10.81, 239.2                                                                    |
| Breast cancer                                                    | 174, 175, 198.81, 217, 457.0, 233.0, v10.3, 239.3                                            |
| Breast disorders                                                 | 610-612                                                                                      |
| Bronchiectasis                                                   | 494, 748.61                                                                                  |
| Bursitis                                                         | 727.2-727.3, 726.61-726.63, 726.65                                                           |
| Cardiac tumors                                                   | 164.1, 212.7                                                                                 |
| Cataracts                                                        | 366                                                                                          |
| Cerebrovascular disease (without specific diagnosis)             | 325, 430-431, 433-436, 438.0, 438.2-438.9, 438.10, 438.12 - 438.19, 437.0-437.1, 437.3-437.9 |
| Charcot-Marie-Tooth disease                                      | 356.1                                                                                        |
| Chronic kidney disease                                           | 585                                                                                          |
| CNS infections                                                   | 320 - 324, 326, 045, 047-049, 013, v12.42, 094                                               |
| CNS tumors                                                       | 190, 191, 192, 198.3-198.4, 234.0, 237.5-237.9, v10.84 - v10.86, v12.41, 239.6, 239.81       |
| Coagulation factor disorders and thrombotic disorders            | 286, 790.92, 289.81, 289.82                                                                  |

|                                                             |                                                                                        |
|-------------------------------------------------------------|----------------------------------------------------------------------------------------|
| Congenital heart disease in adults                          | 745, 746, 747                                                                          |
| Congenital lung disease                                     | 748, 277.0, 273.4                                                                      |
| Conjunctivitis                                              | 372.0, 372.2-372.9, 918.2, 076, 077                                                    |
| Cranial neuropathy                                          | 350.1, 350.8, 351.0, 351.8, 351.9, 350.9, 352, 378.5, 386.12                           |
| Crystal-induced arthropathy                                 | 712, 274, 727.82                                                                       |
| Dermatitis (Eczemas)                                        | 691, 693, 706.3                                                                        |
| Diabetes mellitus                                           | 249, 250, 648.8, 790.2, 791.5, 791.6, V4585, V5391, V6546, v58.67                      |
| Diseases of muscle and neuromuscular function               | 342, 333.4, 358.0, 710.3-710.4, 359                                                    |
| Diseases of the cornea                                      | 370-371, 918.1                                                                         |
| Diseases of the ear                                         | 380-385, 386.0, 386.10, 386.11, 386.19, 386.2-386.9, 387-389, 744.0, 744.3             |
| Diseases of the larynx and airway                           | 476.0                                                                                  |
| Diseases of the oral cavity, pharynx, and salivary glands   | 520-529, 472.1-472.9, 749, 784.8, 750.0-750.2                                          |
| Diseases of the vulva or external genitalia                 | 221, 618, 624, 625.7                                                                   |
| Disorders of calcium metabolism and bone                    | 275.4, 275.5, 781.91, 268, 588.0                                                       |
| Disorders of cerebral function                              | 290, 331, 315.31, 348.82, 438.11, 780.0, 784.3, 294.0, 294.1, 294.2,                   |
| Disorders of the nails                                      | 703, 757.5, 681.02, 681.11                                                             |
| Disorders of the nose and paranasal sinuses                 | 470-471, 474-475, 744.4, 784.7, 784.91                                                 |
| Drug allergy (except drug-induced urticaria and angioedema) | v14, 995.27                                                                            |
| Dysrhythmias or conduction defects                          | 427, 426, 785.0-785.1                                                                  |
| Eating disorders (not including obesity)                    | 307.1, 307.5, 783                                                                      |
| Endocarditis and other cardiovascular infection             | 420, 421, 423.1, 423.2, 424.9, 394.3-394.8, 395.3-395.9, 396.4-396.7 397, 398, 785.51, |
| Enteric infections                                          | 001 - 009, 014, 567.23                                                                 |
| Environmental injury of skin                                | 940-946, 692.70-692.71, 692.76-692.79, 692.0-692.6, 692.8-692.9, 991.0-991.5           |
| Esophageal disease                                          | 530, 456.0-456.2, 750.3-750.4                                                          |
| Evaluation of common pulmonary symptoms                     | 786.1-786.4                                                                            |
| Factitious disorders                                        | 300.16, 300.19                                                                         |

|                                                       |                                                                                                                                                                                                                                          |
|-------------------------------------------------------|------------------------------------------------------------------------------------------------------------------------------------------------------------------------------------------------------------------------------------------|
| Fever of unknown origin (or of too many causes)       | 780.6                                                                                                                                                                                                                                    |
| Food allergy                                          | 995.6, v15.0                                                                                                                                                                                                                             |
| Gastrointestinal or hepatic cancer                    | 150 - 156, 157.0-157.3, 157.5-157.9, 158, 159, 197.4-197.8, 230.1-230.9, v10.0, 239.0                                                                                                                                                    |
| Glaucoma                                              | 365                                                                                                                                                                                                                                      |
| Glomerular disorders                                  | 580.1-580.7, 580.9, 580.81, 581.0-581.7, 581.9, 581.81, 582.0-582.7, 582.9, 582.81, 583.0-583.7, 583.9, 583.81, 446.21, 446.4, 287.0                                                                                                     |
| Gynecologic cancer                                    | 179 - 184, 198.5, 198.82, 198.6, 233.1-233.3, v10.41-v10.44                                                                                                                                                                              |
| Headache                                              | 784.0, 339, 346, 307.81, 350.2                                                                                                                                                                                                           |
| Hematologic malignancies                              | 200-201, 202.0, 202.2-202.9, 203-208, 785.6, 238.6, V10.6, V10.7, 273.1, 273.3, 277.3                                                                                                                                                    |
| Hemoglobinopathies and thalassemias                   | 282.4 - 282.7, 289.7                                                                                                                                                                                                                     |
| Hemolytic anemias                                     | 283, 282.0-282.3, 282.8, 282.9                                                                                                                                                                                                           |
| Hepatic infections                                    | 070, 572.0                                                                                                                                                                                                                               |
| Hypertension                                          | 401 - 405, 437.2                                                                                                                                                                                                                         |
| Hypoglycemia not due to insulinoma                    | 251.0, 251.1, 251.2                                                                                                                                                                                                                      |
| Hypoproliferative anemias                             | 284, 285.0-285.2, 285.4-285.9, 280, 281, 984                                                                                                                                                                                             |
| Hypothalamic disorders                                | 253.9, 253.8                                                                                                                                                                                                                             |
| Infectious arthritis                                  | 711                                                                                                                                                                                                                                      |
| Interstitial lung disease                             | 515, 516, 518.1, 135, 508.0-508.1, 518.3                                                                                                                                                                                                 |
| Ischemic heart disease                                | 410 - 414, 428.0-428.2, 428.4, 428.9, 429.7-429.8, v12.53, v45.81, v45.82, 786.50                                                                                                                                                        |
| Leukocyte disorders                                   | 288                                                                                                                                                                                                                                      |
| Lipid disorders                                       | 272                                                                                                                                                                                                                                      |
| Liver disease                                         | 570, 571, 572.1-572.3, 572.5-572.9, 573, 782.4, 790.4, 275.0, 275.1, 453.0                                                                                                                                                               |
| Localized joint syndromes                             | 716-719, 722, 723.1-723.3, 723.5-723.9, 724.1-724.9, 726.0-726.5, 726.60, 726.64, 726.66-726.69, 726.7-726.9, 727.0-727.1, 727.4-727.7, 727.9, 727.81, 727.83, 727.89, 728.0-728.7, 728.9, 728.81-728.87, 728.89, 824, 354, 808, 830-848 |
| Lower respiratory tract infections                    | 466, 480 - 488, 490, 510, 513, 010-012, 018                                                                                                                                                                                              |
| Lung cancer                                           | 162, 163, 197.0-197.3, 212.3, 231.2, 231.8, 231.9, v10.1, v10.20, v10.29, 239.1                                                                                                                                                          |
| Management of ventilators                             | V46.1                                                                                                                                                                                                                                    |
| Menopause: Management, risks, and benefits of therapy | 627                                                                                                                                                                                                                                      |
| Menstrual disorders                                   | 626, 625.2-625.4                                                                                                                                                                                                                         |

|                                                         |                                                                                                                                                                                                                                                                                                                                                                    |
|---------------------------------------------------------|--------------------------------------------------------------------------------------------------------------------------------------------------------------------------------------------------------------------------------------------------------------------------------------------------------------------------------------------------------------------|
| Metabolic and other bone disease                        | 731-733                                                                                                                                                                                                                                                                                                                                                            |
| Miscellaneous                                           | 991, 992, 994, 780.96, 780.99, 782.2-782.3, 784.60, 790.5-790.6, 790.95, 790.99, 338, 758.0-758.6, 759.3-759.9, v13.3, v13.6                                                                                                                                                                                                                                       |
| Miscellaneous allergy or immunology                     | 279.8-279.9, 518.6, 995.3, 558.3                                                                                                                                                                                                                                                                                                                                   |
| Miscellaneous bladder and kidney disorders              | 596, 587                                                                                                                                                                                                                                                                                                                                                           |
| Miscellaneous cardiovascular disease                    | 429.2 - 429.6, 429.9, 456.5, 456.8, 457.1, 457.3, 457.9, 781.5, 782.5, 785.2, 785.3, 785.9, 457.8, v12.50, v12.51, v12.52, v12.55, v12.59, v45.0, v43.3,                                                                                                                                                                                                           |
| Miscellaneous dermatology                               | 687-690, 695.0-695.2, 695.5-695.9, 698-702, 704.1-704.3, 704.5-704.9, 705, 706.4 - 706.9, 707.1, 707.3-707.9, 709.2 - 709.9, 780.8, 782.1, 782.61, 782.7-782.9, 214, 216, 228, 757.0-757.4, 757.6-757.9                                                                                                                                                            |
| Miscellaneous endocrine disorders                       | 251.3 - 251.9, 252, 254, 259.0-259.1, 259.3-259.4, 259.8-259.9, 270, 271, 275.9, 277.2, 277.4-277.7, 277.9, 277.80-277.87, 277.89, 278.1-278.9, 758.8, 759.0, 759.2, v12.2                                                                                                                                                                                         |
| Miscellaneous gastroenterology                          | 579.1-579.3, 579.8, 579.9, 550-553, 567.0-576.1, 567.21, 567.22, 567.3-567.9, 568, 569.5-569.9, 211, 780.94, 787, 789, v12.70, v12.79                                                                                                                                                                                                                              |
| Miscellaneous hematology disorders                      | 273.0, 273.2, 273.5-273.9, 287.2, 287.8, 287.9, 289.0-289.6, 289.89, 289.9, 790.0-790.1, v12.3                                                                                                                                                                                                                                                                     |
| Miscellaneous infectious disease disorders              | 015-017, 050-052, 054-059, 085.0, 137-139, 457.2, 780.60-780.65, v09                                                                                                                                                                                                                                                                                               |
| Miscellaneous neurologic disorders                      | 225, 294.3-294.9, 330, 335.0-335.1, 335.3-335.9, 336, 337, 341.3-341.7, 343, 347, 348.0, 348.1, 348.3-348.7, 348.9, 348.80, 348.81, 348.83-348.89, 349, 350.0, 350.3-350.7, 351.1-351.7, 356.2-356.3, 356.5-356.7, 357.1-357.9, 740, 741-742, 780.1, 780.3, 780.4, 780.93, 780.97, 781.3, 781.4, 781.6, 781.7, 781.8, 781.92-781.94, 781.99, 782.0, v12.40, v12.49 |
| Miscellaneous obstetrics, gynecology, or women's health | 619, 625.5-625.6, 625.8-625.9, 625.0, 629, 752.40, 752.41, 752.49, v13.1-v13.2                                                                                                                                                                                                                                                                                     |
| Miscellaneous oncology                                  | 165, 235, 236, 239.9, 239.89, 195.1-195.8, 196.1-196.9, 198.89, 199, 224, 229, 743, 234.8, 234.9, 238.80-238.82, 238.84-238.89,                                                                                                                                                                                                                                    |
| Miscellaneous ophthalmologic disorders                  | 918.0, 918.9, 360.5-360.9, 3367, 368, 369, 373-376, 378.0-378.4, 378.6-378.9, 379                                                                                                                                                                                                                                                                                  |
| Miscellaneous otolaryngology or dental medicine         | 478, 744.5, 744.8, 744.9, 781.1, 784.1-784.2, 784.4-781.5, 784.99                                                                                                                                                                                                                                                                                                  |
| Miscellaneous pulmonary disorders                       | 517, 518.0, 518.2, 518.4 - 518.5, 518.81, 519, 790.91, 518.89, v12.60, v12.69                                                                                                                                                                                                                                                                                      |

|                                                         |                                                                                                                                                                                                                                  |
|---------------------------------------------------------|----------------------------------------------------------------------------------------------------------------------------------------------------------------------------------------------------------------------------------|
| Miscellaneous rheumatology or orthopedics               | 213, 215, 713, 734-739, 754-755, 780.71, 781.2, v13.5, v54, v43.6, v45.4,                                                                                                                                                        |
| Mood disorders                                          | 293.83, 296, 300.4, 309.0, 309.1, 311, v11.1, v62.84                                                                                                                                                                             |
| Movement disorders                                      | 332, 333.0-333.3, 333.5-333.8, 333.90, 333.91, 333.93-333.99, 781.0, 307.2                                                                                                                                                       |
| Multiple sclerosis and other demyelinating diseases     | 340, 341.0-341.1, 341.8-341.9                                                                                                                                                                                                    |
| Myelodysplastic syndrome                                | 238.72 - 238.75                                                                                                                                                                                                                  |
| Myeloproliferative disorders                            | 238.4, 238.76, 289.83, 238.77, 238.79, 238.71                                                                                                                                                                                    |
| Myocardial disease                                      | 425, 422, 429.0, 429.1, 428.3, 415.0                                                                                                                                                                                             |
| Neoplasms of the head and neck                          | 140-149, 160, 161, 195.0, 196.0, 212.0, 212.1, 231.0, 231.1, 230.0, v10.21, v10.22                                                                                                                                               |
| Nephrolithiasis                                         | 592, 594, v13.01                                                                                                                                                                                                                 |
| Nerve root syndromes or mechanical lesions of the spine | 723.0, 723.4, 724.0, 729.2, 353                                                                                                                                                                                                  |
| Neuro-ophthalmology (not retinal)                       | 358.1-358.9, 377                                                                                                                                                                                                                 |
| Nodules and tumors of the skin                          | 706.2, 704.4, 214, 216                                                                                                                                                                                                           |
| Nutritional disorders                                   | 260-267, 269, 278.0, v12.1                                                                                                                                                                                                       |
| Obstructive airway diseases                             | 491 - 492, 496, 786.0                                                                                                                                                                                                            |
| Occupational and environmental lung disease             | 500 - 507, 508.2-508.9, 495, 993, 986, 987, 989.81-989.83, E902.0                                                                                                                                                                |
| Oncologic complications of HIV infection                | 176                                                                                                                                                                                                                              |
| Osteoarthritis                                          | 715                                                                                                                                                                                                                              |
| Osteomyelitis                                           | 730                                                                                                                                                                                                                              |
| Other kidney disorders                                  | 453.3, 753.1, 588.1-588.9, 589, 586, 591, 593, v13.03, v42.0                                                                                                                                                                     |
| Other ophthalmologic disorders                          | 360.0-360.4                                                                                                                                                                                                                      |
| Other primary neurologic disorders                      | 759.5, 334, 800-806, 850-854, 432, 952, 344, 721, 341.2, 348.2, 335.2, 333.92, 334, 310                                                                                                                                          |
| Other primary rheumatic disorders                       | 725, 729, 710.2-710.9, v13.4, 759.82, 756, 136.1, 714.3                                                                                                                                                                          |
| Other psychiatric disorders                             | 293.89, 299, 300.10, 300.12-300.15, 300.5-300.6, 300.9, 307.0, 307.6, 307.7, 307.9, 309.22-309.29, 309.3, 309.4, 309.9, 309.82 - 309.89, 312 - 314, 315.0-315.2, 315.30, 315.33-315.39, 315.4-315.9, 316-319, v11.8-v11.9, v11.2 |
| Other urology                                           | 222.0, 222.4, 598, 599.1 - 599.9, 788.0-788.2, 788.5, 788.7-788.8, 788.90, 788.92-788.99, 791.0-791.4, 791.7-791.9, 222-223, 456.4, 603, 605, 608, 752.6, 752.8-752.9, 753.0, 753.2-753.9, 752.6, 752.4, v13.00, v13.09          |
| Ovarian disorders or female reproductive health         | 220, 256, 614, 620, 750.0, 628, v25-v26                                                                                                                                                                                          |
| Pancreatic disease                                      | 577, 579.4, 751.7                                                                                                                                                                                                                |

|                                                                     |                                                                                                                                                                                                               |
|---------------------------------------------------------------------|---------------------------------------------------------------------------------------------------------------------------------------------------------------------------------------------------------------|
| Papulosquamous dermatoses                                           | 696.1-696.9, 697                                                                                                                                                                                              |
| Pericardial disease                                                 | 423.0, 423.3-423.9, 393                                                                                                                                                                                       |
| Peripheral neuropathy                                               | 355, 356.0, 356.4, 356.8, 356.9, 357.0, 956.3,                                                                                                                                                                |
| Personality disorders                                               | 293.81, 293.82, 301                                                                                                                                                                                           |
| Photosensitivity dermatoses                                         | 692.72-692.75                                                                                                                                                                                                 |
| Pigment disorders                                                   | 709.0                                                                                                                                                                                                         |
| Platelet disorders                                                  | 287.1, 287.3, 287.4, 287.5, 289.84                                                                                                                                                                            |
| Pleural disease                                                     | 511, 512, 860                                                                                                                                                                                                 |
| Polyglandular disorders                                             | 258                                                                                                                                                                                                           |
| Porphyrias                                                          | 277.1                                                                                                                                                                                                         |
| Posterior pituitary and water metabolism                            | 253.5, 253.6, 276.0, 276.1, 276.52                                                                                                                                                                            |
| Poststreptococcal glomerulonephritis                                | 580.0,                                                                                                                                                                                                        |
| Pregnancy                                                           | 630-647, 648.0-648.7, 648.9, 649-679, 760-763, 764-779, v13.7, v20-v24, v28, v29                                                                                                                              |
| Preoperative consultation                                           | V72.81-V72.84                                                                                                                                                                                                 |
| Pressure ulcers or decubiti                                         | 707.0, 707.2                                                                                                                                                                                                  |
| Primary immunodeficiency disorders                                  | 279.0-279.3                                                                                                                                                                                                   |
| Procedure- and device-associated infections                         | 996.6, 997, 998                                                                                                                                                                                               |
| Prostate disorders                                                  | 600, 601, 602                                                                                                                                                                                                 |
| Pulmonary vascular disease                                          | 514, 415.1, 416-417, 573.5                                                                                                                                                                                    |
| Retinal disease                                                     | 361-363                                                                                                                                                                                                       |
| Rheumatic fever                                                     | 390 - 392, 785.4, 785.52                                                                                                                                                                                      |
| Rheumatoid arthritis                                                | 714.0-714.2, 714.4-714.9                                                                                                                                                                                      |
| Rhinitis or Sinusitis or Conjunctivitis                             | 472.0, 477, 372.1                                                                                                                                                                                             |
| Schizophrenia and delusional (paranoid) disorders                   | 295, 297, 298, v11.0                                                                                                                                                                                          |
| Seizures                                                            | 345                                                                                                                                                                                                           |
| Sexual and gender identity disorders                                | 302                                                                                                                                                                                                           |
| Sexually transmitted diseases and infections of reproductive organs | 090 - 093, 094, 095-098, 099.0-099.2, 099.4-099.9 , 079.4, 614.0, 616.1                                                                                                                                       |
| Skin and soft tissue infections                                     | 680, 681.00, 681.01, 681.03-681.09, 681.12-681.19, 681.2-681.9 ,682 - 686, 085.1-085.9, 110-118                                                                                                               |
| Skin cancer                                                         | 172, 173, 198.2, 232, 238.2, v10.82, v10.83, 202.1                                                                                                                                                            |
| Sleep medicine                                                      | 307.4, 327, 780.5, 278.03                                                                                                                                                                                     |
| Small intestinal disease or Colonic and anorectal disease           | 040.2, 560, 562, 579.0, 751.0-751.1, 455, 562.1, 564, 565, 566, 569.0-569.4, 751.2-751.3, 540-543, 555, 556, 557, 558.0-558.2, 558.4-558.9, 560, 750.8-750.9, 751.5-751.6, 751.8-751.9 , 751.2, 751.4, v12.72 |
| Soft tissue cancer                                                  | 171, 238.1                                                                                                                                                                                                    |



|                                                     |                                                                                                                                                                                                          |
|-----------------------------------------------------|----------------------------------------------------------------------------------------------------------------------------------------------------------------------------------------------------------|
| Solitary pulmonary nodule                           | 793.11                                                                                                                                                                                                   |
| Somatoform disorders                                | 300.8, 300.7, 300.11, 306, 307.80, 307.89                                                                                                                                                                |
| Specific causative organisms                        | 020-027, 030-039, 040.0-040.1, 040.3, 040.4, 040.81, 040.89, 041, 046, 060 - 066, 071-075, 078, 079.0-0.79.3, 079.5, 079.7-079.9, 080-084, 086-088, 100-104, 120-129, 130-134, 136.0, 136.2-136.9, 790.8 |
| Spondyloarthropathies                               | 720, 696.0, 099.3                                                                                                                                                                                        |
| Sports injuries and trauma                          | E84.94 , 807, 809, 810-823, 825-829                                                                                                                                                                      |
| Stomach or duodenum                                 | 041.86, 531-539, 750.5-750.7, v12.71                                                                                                                                                                     |
| Substance use disorder                              | 291-292, 303-305, v11.3                                                                                                                                                                                  |
| Syncope                                             | 780.2, 458.0                                                                                                                                                                                             |
| Systemic lupus erythematosus                        | 710.0, 695.4                                                                                                                                                                                             |
| Systemic sclerosis                                  | 710.1, 443.0                                                                                                                                                                                             |
| Testes or male reproductive health                  | 257, 259.5, 606, 607, 752.5, 758.7                                                                                                                                                                       |
| Thyroid disorders                                   | 240-246, 790.94                                                                                                                                                                                          |
| Transfusion medicine (principles and complications) | 275.02, 287.41, 780.66                                                                                                                                                                                   |
| Tubulointerstitial disease                          | 580.89, 581.89, 582.89, 583.89                                                                                                                                                                           |
| Undiagnosed gastrointestinal hemorrhage             | 578                                                                                                                                                                                                      |
| Upper respiratory tract infections                  | 460 - 465, 079.6, 383.0-383.1, 476.1                                                                                                                                                                     |
| Urinary incontinence                                | 788.3, 788.91, 788.6, 788.4                                                                                                                                                                              |
| Urinary tract infections                            | 599.0 , 590, 595, 597, 604, v13.02                                                                                                                                                                       |
| Urologic cancer                                     | 185-189, 198.0-198.1, 790.93, 233.4-233.9, v10.45-v10.49, v10.5, 239.4, 239.5                                                                                                                            |
| Urticaria and angioedema                            | 995.1, 708                                                                                                                                                                                               |
| Uterine disorders                                   | 218, 219, 615-617, 621-622, 752.2, 752.3, 752.43, 752.44                                                                                                                                                 |
| Uveitis                                             | 364                                                                                                                                                                                                      |
| Vaginal disorders (not vulvovaginitis)              | 623, 625.1, 752.45-752.47                                                                                                                                                                                |
| Valvular heart disease                              | 394.0-394.2,394.9, 395.0-395.2, 396.0-396.3, 396.8, 396.9, 424.0-424.3.                                                                                                                                  |
| Vascular dermatoses                                 | 709.1                                                                                                                                                                                                    |
| Vascular disease                                    | 440-442, 443.1-443.9, 444, 447.0-447.5, 447.7-447.9, 448, 451, 452, 453.1-453.2, 453.4-453.9, 454, 458.1-458.9, 459, v12.54                                                                              |
| Vasculitis                                          | 446.0-446.1, 446.20, 446.29, 446.3, 446.5-446.7, 447.6                                                                                                                                                   |
| Vesiculobullous dermatoses                          | 694                                                                                                                                                                                                      |
| Water and electrolyte balance                       | 276.2-276.4, 276.50, 276.51, 275.2, 275.3                                                                                                                                                                |

**eTable 2. Distribution of Examination Question, Office Visit and Hospital Stay Percentages Across 186 Medical Conditions**

| Concordance designation / Conditions                     | Question |                     | Office visit, % (95% CI)c | Hospital stay, % (95% CI)d | Question minus visit, % (95% CI) | Question minus hospital stay, % (95% CI) |
|----------------------------------------------------------|----------|---------------------|---------------------------|----------------------------|----------------------------------|------------------------------------------|
|                                                          | No.      | % (95% CI)b         |                           |                            |                                  |                                          |
| <b>Concordant conditions</b>                             |          |                     |                           |                            |                                  |                                          |
| Small intestinal disease & Colonic and anorectal disease | 87       | 2.51 (1.99 to 3.04) | 2.28 (1.31 to 3.96)       | 4.29 (4.09 to 4.48)        | 0.23 (-1.14 to 1.60)             | -1.77 (-2.33 to -1.22)                   |
| Ischemic heart disease                                   | 78       | 2.25 (1.76 to 2.75) | 2.52 (1.95 to 3.25)       | 7.94 (7.68 to 8.20)        | -0.26 (-1.08 to 0.55)            | -5.69 (-6.24 to -5.13)                   |
| Obstructive airway diseases                              | 75       | 2.17 (1.68 to 2.65) | 2.11 (1.72 to 2.57)       | 2.54 (2.38 to 2.69)        | 0.06 (-0.58 to 0.70)             | -0.37 (-0.88 to 0.14)                    |
| Diabetes mellitus                                        | 66       | 1.91 (1.45 to 2.36) | 8.69 (7.34 to 10.27)      | 2.32 (2.17 to 2.46)        | -6.79 (-8.32 to -5.25)           | -0.41 (-0.89 to 0.07)                    |
| Hypertension                                             | 66       | 1.91 (1.45 to 2.36) | 13.87 (12.52 to 15.35)    | 1.84 (1.71 to 1.97)        | -11.97 (-13.45 to -10.49)        | 0.06 (-0.41 to 0.54)                     |
| Vascular disease                                         | 56       | 1.62 (1.20 to 2.04) | 0.82 (0.54 to 1.25)       | 2.02 (1.88 to 2.16)        | 0.80 (0.25 to 1.34)              | -0.40 (-0.84 to 0.04)                    |
| Myocardial disease                                       | 47       | 1.36 (0.97 to 1.74) | 0.19 (0.11 to 0.33)       | 1.04 (0.94 to 1.14)        | 1.16 (0.77 to 1.56)              | 0.32 (-0.08 to 0.72)                     |
| Thyroid disorders                                        | 45       | 1.30 (0.92 to 1.68) | 1.39 (1.15 to 1.69)       | 0.28 (0.23 to 0.33)        | -0.09 (-0.56 to 0.37)            | 1.02 (0.64 to 1.40)                      |
| Gastrointestinal or hepatic cancer                       | 42       | 1.21 (0.85 to 1.58) | 0.35 (0.16 to 0.75)       | 1.16 (1.06 to 1.26)        | 0.86 (0.41 to 1.32)              | 0.05 (-0.33 to 0.43)                     |
| Specific causative organisms                             | 41       | 1.18 (0.82 to 1.55) | 0.77 (0.56 to 1.06)       | 3.20 (3.03 to 3.37)        | 0.42 (-0.02 to 0.85)             | -2.02 (-2.42 to -1.62)                   |

|                                                           |    |                     |                     |                     |                        |                        |
|-----------------------------------------------------------|----|---------------------|---------------------|---------------------|------------------------|------------------------|
| Esophageal disease                                        | 40 | 1.16 (0.80 to 1.51) | 1.34 (1.07 to 1.68) | 0.64 (0.57 to 0.72) | -0.18 (-0.65 to 0.28)  | 0.51 (0.15 to 0.88)    |
| Pulmonary vascular disease                                | 40 | 1.16 (0.80 to 1.51) | 0.11 (0.06 to 0.21) | 0.85 (0.76 to 0.94) | 1.05 (0.68 to 1.41)    | 0.31 (-0.06 to 0.67)   |
| Mood disorders                                            | 39 | 1.13 (0.78 to 1.48) | 1.61 (1.24 to 2.07) | 2.93 (2.77 to 3.10) | -0.48 (-1.02 to 0.06)  | -1.81 (-2.19 to -1.42) |
| Hypoproliferative anemias                                 | 36 | 1.04 (0.70 to 1.38) | 0.98 (0.75 to 1.27) | 1.03 (0.93 to 1.13) | 0.06 (-0.36 to 0.49)   | 0.01 (-0.34 to 0.36)   |
| Skin and soft tissue infections                           | 35 | 1.01 (0.68 to 1.34) | 1.73 (1.40 to 2.14) | 2.10 (1.96 to 2.23) | -0.72 (-1.22 to -0.22) | -1.08 (-1.44 to -0.72) |
| Breast cancer                                             | 34 | 0.98 (0.65 to 1.31) | 0.45 (0.18 to 1.08) | 0.37 (0.32 to 0.43) | 0.54 (0.02 to 1.05)    | 0.61 (0.27 to 0.94)    |
| Other primary rheumatic disorders                         | 33 | 0.95 (0.63 to 1.28) | 1.52 (1.22 to 1.89) | 0.27 (0.22 to 0.32) | -0.57 (-1.03 to -0.10) | 0.68 (0.36 to 1.01)    |
| Sleep medicine                                            | 32 | 0.92 (0.61 to 1.24) | 0.64 (0.44 to 0.94) | 0.05 (0.03 to 0.07) | 0.28 (-0.12 to 0.68)   | 0.88 (0.56 to 1.20)    |
| Lung cancer                                               | 32 | 0.92 (0.61 to 1.24) | 0.28 (0.11 to 0.69) | 0.67 (0.59 to 0.75) | 0.65 (0.24 to 1.05)    | 0.25 (-0.08 to 0.58)   |
| Pregnancy                                                 | 31 | 0.90 (0.58 to 1.21) | 0.28 (0.15 to 0.52) | 1.69 (1.56 to 1.81) | 0.62 (0.26 to 0.98)    | -0.79 (-1.13 to -0.45) |
| Diseases of the oral cavity, pharynx, and salivary glands | 30 | 0.87 (0.56 to 1.18) | 0.29 (0.16 to 0.52) | 0.17 (0.13 to 0.21) | 0.58 (0.23 to 0.93)    | 0.70 (0.38 to 1.01)    |
| Urologic cancer                                           | 30 | 0.87 (0.56 to 1.18) | 0.26 (0.15 to 0.47) | 0.66 (0.58 to 0.74) | 0.60 (0.26 to 0.95)    | 0.21 (-0.11 to 0.53)   |
| Enteric infections                                        | 30 | 0.87 (0.56 to 1.18) | 0.16 (0.08 to 0.29) | 0.74 (0.66 to 0.83) | 0.71 (0.39 to 1.03)    | 0.12 (-0.20 to 0.44)   |

|                                             |    |                     |                     |                     |                        |                        |
|---------------------------------------------|----|---------------------|---------------------|---------------------|------------------------|------------------------|
| Miscellaneous cardiovascular disease        | 28 | 0.81 (0.51 to 1.11) | 0.40 (0.27 to 0.61) | 0.05 (0.03 to 0.07) | 0.41 (0.06 to 0.75)    | 0.76 (0.46 to 1.06)    |
| Crystal-induced arthropathy                 | 27 | 0.78 (0.49 to 1.07) | 0.43 (0.30 to 0.63) | 0.07 (0.05 to 0.10) | 0.35 (0.01 to 0.68)    | 0.71 (0.41 to 1.00)    |
| Pleural disease                             | 27 | 0.78 (0.49 to 1.07) | 0.02 (0.01 to 0.07) | 0.51 (0.44 to 0.58) | 0.76 (0.47 to 1.06)    | 0.27 (-0.03 to 0.57)   |
| Stomach or duodenum                         | 26 | 0.75 (0.46 to 1.04) | 0.65 (0.44 to 0.97) | 1.24 (1.13 to 1.35) | 0.10 (-0.29 to 0.49)   | -0.49 (-0.79 to -0.18) |
| Hemoglobinopathies and thalassemias         | 26 | 0.75 (0.46 to 1.04) | 0.02 (0.00 to 0.06) | 0.26 (0.21 to 0.30) | 0.74 (0.45 to 1.02)    | 0.50 (0.20 to 0.79)    |
| Syncope                                     | 25 | 0.72 (0.44 to 1.00) | 0.17 (0.09 to 0.31) | 0.30 (0.25 to 0.35) | 0.55 (0.25 to 0.85)    | 0.42 (0.13 to 0.71)    |
| Asthma                                      | 24 | 0.69 (0.42 to 0.97) | 1.32 (1.04 to 1.67) | 1.12 (1.01 to 1.22) | -0.63 (-1.04 to -0.21) | -0.42 (-0.72 to -0.13) |
| Water and electrolyte balance               | 24 | 0.69 (0.42 to 0.97) | 0.02 (0.01 to 0.04) | 0.94 (0.85 to 1.04) | 0.68 (0.40 to 0.95)    | -0.25 (-0.54 to 0.04)  |
| Diseases of the ear                         | 23 | 0.66 (0.39 to 0.94) | 1.32 (1.02 to 1.69) | 0.19 (0.15 to 0.23) | -0.65 (-1.08 to -0.22) | 0.47 (0.20 to 0.75)    |
| Systemic lupus erythematosus                | 23 | 0.66 (0.39 to 0.94) | 0.04 (0.02 to 0.09) | 0.05 (0.03 to 0.07) | 0.62 (0.35 to 0.89)    | 0.61 (0.34 to 0.89)    |
| Occupational and environmental lung disease | 23 | 0.66 (0.39 to 0.94) | 0.02 (0.00 to 0.07) | 0.79 (0.70 to 0.88) | 0.65 (0.38 to 0.92)    | -0.13 (-0.41 to 0.16)  |
| Miscellaneous pulmonary disorders           | 22 | 0.64 (0.37 to 0.90) | 0.22 (0.12 to 0.42) | 1.08 (0.98 to 1.18) | 0.41 (0.11 to 0.72)    | -0.44 (-0.72 to -0.16) |

|                                                      |    |                     |                     |                     |                       |                        |
|------------------------------------------------------|----|---------------------|---------------------|---------------------|-----------------------|------------------------|
| Ovarian disorders or Female reproductive health      | 22 | 0.64 (0.37 to 0.90) | 0.13 (0.07 to 0.26) | 0.35 (0.30 to 0.41) | 0.50 (0.22 to 0.78)   | 0.28 (0.01 to 0.55)    |
| Glomerular disorders                                 | 22 | 0.64 (0.37 to 0.90) | 0.00 (na)           | 0.03 (0.01 to 0.04) | 0.64 (0.37 to 0.90)   | 0.61 (0.34 to 0.87)    |
| Tubulointerstitial disease                           | 22 | 0.64 (0.37 to 0.90) | 0.00 (na)           | 0.00 (0.00 to 0.01) | 0.64 (0.37 to 0.90)   | 0.63 (0.37 to 0.90)    |
| Rhinitis or Sinusitis or Conjunctivitis              | 21 | 0.61 (0.35 to 0.87) | 0.97 (0.75 to 1.26) | 0.01 (0.00 to 0.02) | -0.37 (-0.73 to 0.00) | 0.60 (0.34 to 0.86)    |
| AIDS and HIV infection                               | 21 | 0.61 (0.35 to 0.87) | 0.22 (0.10 to 0.46) | 0.16 (0.12 to 0.20) | 0.39 (0.08 to 0.70)   | 0.45 (0.19 to 0.71)    |
| Rheumatoid arthritis                                 | 21 | 0.61 (0.35 to 0.87) | 0.14 (0.08 to 0.24) | 0.06 (0.03 to 0.08) | 0.46 (0.20 to 0.73)   | 0.55 (0.29 to 0.81)    |
| Retinal disease                                      | 21 | 0.61 (0.35 to 0.87) | 0.06 (0.02 to 0.22) | 0.02 (0.01 to 0.04) | 0.55 (0.28 to 0.82)   | 0.59 (0.33 to 0.84)    |
| Somatoform disorders                                 | 21 | 0.61 (0.35 to 0.87) | 0.01 (0.00 to 0.08) | 0.04 (0.02 to 0.06) | 0.59 (0.34 to 0.85)   | 0.57 (0.31 to 0.83)    |
| Cerebrovascular disease (without specific diagnosis) | 20 | 0.58 (0.33 to 0.83) | 0.48 (0.33 to 0.69) | 3.62 (3.44 to 3.80) | 0.10 (-0.20 to 0.41)  | -3.04 (-3.35 to -2.73) |
| Cranial neuropathy                                   | 20 | 0.58 (0.33 to 0.83) | 0.07 (0.03 to 0.17) | 0.08 (0.05 to 0.11) | 0.51 (0.25 to 0.77)   | 0.50 (0.25 to 0.75)    |
| Myeloproliferative disorders                         | 20 | 0.58 (0.33 to 0.83) | 0.04 (0.01 to 0.13) | 0.03 (0.01 to 0.05) | 0.53 (0.28 to 0.79)   | 0.55 (0.29 to 0.80)    |

|                                                                     |    |                     |                     |                     |                        |                        |
|---------------------------------------------------------------------|----|---------------------|---------------------|---------------------|------------------------|------------------------|
| Sexually transmitted diseases and infections of reproductive organs | 20 | 0.58 (0.33 to 0.83) | 0.02 (0.01 to 0.05) | 0.01 (0.00 to 0.01) | 0.55 (0.30 to 0.81)    | 0.57 (0.32 to 0.82)    |
| Chronic kidney disease                                              | 19 | 0.55 (0.30 to 0.80) | 0.35 (0.18 to 0.66) | 0.28 (0.23 to 0.33) | 0.20 (-0.13 to 0.54)   | 0.27 (0.02 to 0.52)    |
| Pancreatic disease                                                  | 19 | 0.55 (0.30 to 0.80) | 0.30 (0.09 to 0.99) | 1.11 (1.01 to 1.21) | 0.25 (-0.18 to 0.69)   | -0.56 (-0.83 to -0.29) |
| Peripheral neuropathy                                               | 19 | 0.55 (0.30 to 0.80) | 0.22 (0.13 to 0.37) | 0.09 (0.06 to 0.12) | 0.33 (0.06 to 0.61)    | 0.46 (0.21 to 0.71)    |
| Spondyloarthropathies                                               | 19 | 0.55 (0.30 to 0.80) | 0.01 (0.00 to 0.02) | 0.01 (0.00 to 0.01) | 0.54 (0.30 to 0.79)    | 0.54 (0.30 to 0.79)    |
| Preoperative consultation                                           | 18 | 0.52 (0.28 to 0.76) | 0.61 (0.42 to 0.89) | 0.00 (na)           | -0.09 (-0.42 to 0.24)  | 0.52 (0.28 to 0.76)    |
| Miscellaneous allergy or immunology                                 | 18 | 0.52 (0.28 to 0.76) | 0.21 (0.06 to 0.69) | 0.01 (0.00 to 0.01) | 0.31 (-0.04 to 0.66)   | 0.51 (0.27 to 0.75)    |
| Bacteremia or sepsis syndrome                                       | 18 | 0.52 (0.28 to 0.76) | 0.00 (na)           | 0.03 (0.01 to 0.05) | 0.52 (0.28 to 0.76)    | 0.49 (0.25 to 0.73)    |
| Anxiety disorders                                                   | 17 | 0.49 (0.26 to 0.72) | 1.36 (1.08 to 1.70) | 0.20 (0.16 to 0.25) | -0.86 (-1.25 to -0.48) | 0.29 (0.05 to 0.52)    |
| Other primary neurologic disorders                                  | 17 | 0.49 (0.26 to 0.72) | 0.43 (0.28 to 0.64) | 2.09 (1.95 to 2.23) | 0.07 (-0.23 to 0.36)   | -1.60 (-1.87 to -1.33) |
| Papulosquamous dermatoses                                           | 17 | 0.49 (0.26 to 0.72) | 0.06 (0.03 to 0.11) | 0.00 (na)           | 0.44 (0.20 to 0.67)    | 0.49 (0.26 to 0.72)    |

|                                               |    |                     |                     |                     |                       |                        |
|-----------------------------------------------|----|---------------------|---------------------|---------------------|-----------------------|------------------------|
| Neuro-ophthalmology (not retinal)             | 17 | 0.49 (0.26 to 0.72) | 0.00 (0.00 to 0.03) | 0.02 (0.01 to 0.04) | 0.49 (0.25 to 0.72)   | 0.47 (0.24 to 0.70)    |
| Substance use disorder                        | 16 | 0.46 (0.24 to 0.69) | 0.61 (0.22 to 1.71) | 1.69 (1.57 to 1.81) | -0.15 (-0.82 to 0.52) | -1.23 (-1.49 to -0.97) |
| Other kidney disorders                        | 16 | 0.46 (0.24 to 0.69) | 0.31 (0.19 to 0.49) | 0.25 (0.20 to 0.29) | 0.15 (-0.11 to 0.42)  | 0.22 (-0.02 to 0.45)   |
| Nodules and tumors of the skin                | 16 | 0.46 (0.24 to 0.69) | 0.17 (0.11 to 0.27) | 0.02 (0.01 to 0.04) | 0.29 (0.05 to 0.53)   | 0.44 (0.21 to 0.67)    |
| Anterior pituitary disorders                  | 16 | 0.46 (0.24 to 0.69) | 0.03 (0.01 to 0.08) | 0.00 (0.00 to 0.01) | 0.43 (0.21 to 0.66)   | 0.46 (0.23 to 0.69)    |
| CNS tumors                                    | 16 | 0.46 (0.24 to 0.69) | 0.02 (0.01 to 0.11) | 0.32 (0.27 to 0.37) | 0.44 (0.21 to 0.67)   | 0.14 (-0.09 to 0.37)   |
| Bronchiectasis                                | 16 | 0.46 (0.24 to 0.69) | 0.00 (0.00 to 0.01) | 0.04 (0.02 to 0.06) | 0.46 (0.23 to 0.69)   | 0.42 (0.19 to 0.65)    |
| Prostate disorders                            | 15 | 0.43 (0.21 to 0.65) | 0.18 (0.10 to 0.31) | 0.26 (0.21 to 0.31) | 0.25 (0.01 to 0.50)   | 0.17 (-0.05 to 0.40)   |
| Procedure- and device-associated infections   | 15 | 0.43 (0.21 to 0.65) | 0.07 (0.02 to 0.28) | 2.14 (2.00 to 2.28) | 0.37 (0.13 to 0.61)   | -1.71 (-1.97 to -1.45) |
| Diseases of muscle and neuromuscular function | 15 | 0.43 (0.21 to 0.65) | 0.04 (0.02 to 0.11) | 0.16 (0.13 to 0.20) | 0.39 (0.17 to 0.61)   | 0.27 (0.05 to 0.49)    |
| Diseases of the larynx and airway             | 15 | 0.43 (0.21 to 0.65) | 0.00 (na)           | 0.00 (na)           | 0.43 (0.21 to 0.65)   | 0.43 (0.21 to 0.65)    |
| Infectious arthritis                          | 15 | 0.43 (0.21 to 0.65) | 0.00 (0.00 to 0.01) | 0.10 (0.07 to 0.13) | 0.43 (0.21 to 0.65)   | 0.33 (0.11 to 0.55)    |
| Nephrolithiasis                               | 14 | 0.40 (0.19 to 0.62) | 0.18 (0.10 to 0.32) | 0.60 (0.52 to 0.67) | 0.23 (-0.01 to 0.47)  | -0.19 (-0.42 to 0.03)  |

|                                                       |    |                     |                     |                     |                        |                        |
|-------------------------------------------------------|----|---------------------|---------------------|---------------------|------------------------|------------------------|
| Conjunctivitis                                        | 13 | 0.38 (0.17 to 0.58) | 0.33 (0.21 to 0.52) | 0.00 (0.00 to 0.01) | 0.05 (-0.20 to 0.30)   | 0.37 (0.17 to 0.58)    |
| Undiagnosed gastrointestinal hemorrhage               | 13 | 0.38 (0.17 to 0.58) | 0.14 (0.06 to 0.31) | 0.78 (0.70 to 0.87) | 0.24 (0.00 to 0.47)    | -0.41 (-0.63 to -0.19) |
| Vascular dermatoses                                   | 13 | 0.38 (0.17 to 0.58) | 0.00 (na)           | 0.00 (na)           | 0.38 (0.17 to 0.58)    | 0.38 (0.17 to 0.58)    |
| Dermatitis (Eczemas)                                  | 12 | 0.35 (0.15 to 0.54) | 0.10 (0.04 to 0.27) | 0.04 (0.02 to 0.06) | 0.24 (0.02 to 0.46)    | 0.30 (0.11 to 0.50)    |
| Gynecologic cancer                                    | 12 | 0.35 (0.15 to 0.54) | 0.01 (0.01 to 0.04) | 0.45 (0.38 to 0.51) | 0.33 (0.14 to 0.53)    | -0.10 (-0.31 to 0.11)  |
| Miscellaneous hematology disorders                    | 11 | 0.32 (0.13 to 0.51) | 0.16 (0.06 to 0.43) | 0.04 (0.02 to 0.06) | 0.16 (-0.09 to 0.40)   | 0.28 (0.09 to 0.46)    |
| Menopause: Management, risks, and benefits of therapy | 11 | 0.32 (0.13 to 0.51) | 0.11 (0.05 to 0.25) | 0.03 (0.01 to 0.05) | 0.20 (0.00 to 0.41)    | 0.29 (0.10 to 0.48)    |
| Other urology                                         | 10 | 0.29 (0.11 to 0.47) | 0.64 (0.42 to 0.97) | 0.23 (0.19 to 0.28) | -0.35 (-0.67 to -0.03) | 0.05 (-0.13 to 0.24)   |
| Miscellaneous ophthalmologic disorders                | 10 | 0.29 (0.11 to 0.47) | 0.32 (0.20 to 0.51) | 0.09 (0.06 to 0.12) | -0.03 (-0.26 to 0.20)  | 0.20 (0.02 to 0.38)    |
| Miscellaneous rheumatology or orthopedics             | 10 | 0.29 (0.11 to 0.47) | 0.26 (0.17 to 0.41) | 0.27 (0.22 to 0.32) | 0.02 (-0.19 to 0.24)   | 0.02 (-0.17 to 0.20)   |
| Urticaria and angioedema                              | 10 | 0.29 (0.11 to 0.47) | 0.14 (0.07 to 0.29) | 0.07 (0.04 to 0.09) | 0.15 (-0.06 to 0.35)   | 0.22 (0.04 to 0.40)    |



|                                                             |    |                     |                     |                     |                        |                      |
|-------------------------------------------------------------|----|---------------------|---------------------|---------------------|------------------------|----------------------|
| Disorders of the nose and paranasal sinuses                 | 10 | 0.29 (0.11 to 0.47) | 0.13 (0.06 to 0.27) | 0.03 (0.01 to 0.05) | 0.16 (-0.04 to 0.37)   | 0.26 (0.08 to 0.44)  |
| Vaginal disorders (not vulvovaginitis)                      | 10 | 0.29 (0.11 to 0.47) | 0.06 (0.02 to 0.19) | 0.02 (0.01 to 0.04) | 0.23 (0.04 to 0.42)    | 0.26 (0.09 to 0.44)  |
| Vesiculobullous dermatoses                                  | 10 | 0.29 (0.11 to 0.47) | 0.01 (0.00 to 0.07) | 0.00 (0.00 to 0.01) | 0.27 (0.09 to 0.45)    | 0.28 (0.11 to 0.46)  |
| Management of ventilators                                   | 10 | 0.29 (0.11 to 0.47) | 0.00 (na)           | 0.01 (0.00 to 0.01) | 0.29 (0.11 to 0.47)    | 0.28 (0.10 to 0.46)  |
| Uveitis                                                     | 10 | 0.29 (0.11 to 0.47) | 0.00 (na)           | 0.00 (0.00 to 0.01) | 0.29 (0.11 to 0.47)    | 0.28 (0.11 to 0.46)  |
| Miscellaneous infectious disease disorders                  | 9  | 0.26 (0.09 to 0.43) | 0.76 (0.58 to 0.99) | 0.07 (0.05 to 0.10) | -0.50 (-0.76 to -0.23) | 0.19 (0.02 to 0.36)  |
| Movement disorders                                          | 9  | 0.26 (0.09 to 0.43) | 0.28 (0.16 to 0.49) | 0.14 (0.10 to 0.18) | -0.02 (-0.25 to 0.21)  | 0.12 (-0.05 to 0.29) |
| Breast disorders                                            | 9  | 0.26 (0.09 to 0.43) | 0.25 (0.15 to 0.42) | 0.09 (0.06 to 0.12) | 0.01 (-0.20 to 0.22)   | 0.17 (0.00 to 0.34)  |
| Hepatic infections                                          | 9  | 0.26 (0.09 to 0.43) | 0.13 (0.07 to 0.24) | 0.15 (0.11 to 0.19) | 0.13 (-0.06 to 0.32)   | 0.11 (-0.06 to 0.28) |
| Drug allergy (except drug-induced urticaria and angioedema) | 9  | 0.26 (0.09 to 0.43) | 0.06 (0.01 to 0.22) | 0.01 (0.00 to 0.02) | 0.20 (0.02 to 0.39)    | 0.25 (0.08 to 0.42)  |
| Anaphylaxis                                                 | 9  | 0.26 (0.09 to 0.43) | 0.01 (0.00 to 0.04) | 0.02 (0.01 to 0.03) | 0.25 (0.08 to 0.42)    | 0.24 (0.07 to 0.41)  |
| Adverse effects of cancer chemotherapy                      | 9  | 0.26 (0.09 to 0.43) | 0.00 (na)           | 0.02 (0.00 to 0.03) | 0.26 (0.09 to 0.43)    | 0.24 (0.07 to 0.41)  |

|                                                         |   |                     |                     |                     |                        |                        |
|---------------------------------------------------------|---|---------------------|---------------------|---------------------|------------------------|------------------------|
| Nutritional disorders                                   | 8 | 0.23 (0.07 to 0.39) | 1.49 (0.75 to 2.92) | 0.71 (0.63 to 0.79) | -1.26 (-2.28 to -0.23) | -0.48 (-0.66 to -0.30) |
| Urinary incontinence                                    | 8 | 0.23 (0.07 to 0.39) | 0.17 (0.11 to 0.26) | 0.00 (na)           | 0.06 (-0.11 to 0.24)   | 0.23 (0.07 to 0.39)    |
| Posterior pituitary and water metabolism                | 8 | 0.23 (0.07 to 0.39) | 0.03 (0.01 to 0.09) | 0.78 (0.69 to 0.86) | 0.20 (0.03 to 0.36)    | -0.55 (-0.73 to -0.37) |
| Congenital lung disease                                 | 8 | 0.23 (0.07 to 0.39) | 0.02 (0.01 to 0.10) | 0.03 (0.02 to 0.05) | 0.21 (0.04 to 0.37)    | 0.20 (0.04 to 0.36)    |
| Testes or Male reproductive health                      | 7 | 0.20 (0.05 to 0.35) | 0.41 (0.26 to 0.66) | 0.02 (0.00 to 0.03) | -0.21 (-0.45 to 0.04)  | 0.19 (0.04 to 0.34)    |
| Factitious disorders                                    | 7 | 0.20 (0.05 to 0.35) | 0.00 (na)           | 0.00 (0.00 to 0.01) | 0.20 (0.05 to 0.35)    | 0.20 (0.05 to 0.35)    |
| Eating disorders (not including obesity)                | 6 | 0.17 (0.03 to 0.31) | 0.41 (0.14 to 1.17) | 0.02 (0.00 to 0.03) | -0.23 (-0.69 to 0.22)  | 0.16 (0.02 to 0.30)    |
| Glaucoma                                                | 6 | 0.17 (0.03 to 0.31) | 0.05 (0.02 to 0.15) | 0.00 (0.00 to 0.01) | 0.12 (-0.03 to 0.27)   | 0.17 (0.03 to 0.31)    |
| Headache                                                | 5 | 0.14 (0.02 to 0.27) | 0.89 (0.72 to 1.11) | 0.27 (0.22 to 0.32) | -0.75 (-0.98 to -0.52) | -0.13 (-0.26 to 0.01)  |
| Metabolic and other bone disease                        | 5 | 0.14 (0.02 to 0.27) | 0.48 (0.32 to 0.71) | 0.57 (0.49 to 0.64) | -0.34 (-0.56 to -0.11) | -0.42 (-0.57 to -0.28) |
| Nerve root syndromes or Mechanical lesions of the spine | 5 | 0.14 (0.02 to 0.27) | 0.35 (0.24 to 0.53) | 0.45 (0.39 to 0.52) | -0.21 (-0.40 to -0.02) | -0.31 (-0.45 to -0.16) |
| Sports injuries or trauma                               | 5 | 0.14 (0.02 to 0.27) | 0.28 (0.18 to 0.45) | 2.49 (2.34 to 2.64) | -0.14 (-0.32 to 0.04)  | -2.35 (-2.54 to -2.15) |
| Cataracts                                               | 5 | 0.14 (0.02 to 0.27) | 0.11 (0.05 to 0.24) | 0.01 (0.00 to 0.03) | 0.03 (-0.12 to 0.19)   | 0.13 (0.00 to 0.26)    |

|                                                                  |   |                     |                     |                     |                       |                        |
|------------------------------------------------------------------|---|---------------------|---------------------|---------------------|-----------------------|------------------------|
| Assorted endocrine tumors and endocrine manifestations of tumors | 5 | 0.14 (0.02 to 0.27) | 0.09 (0.04 to 0.17) | 0.24 (0.19 to 0.28) | 0.06 (-0.08 to 0.20)  | -0.09 (-0.23 to 0.04)  |
| Neoplasms of the head and neck                                   | 5 | 0.14 (0.02 to 0.27) | 0.08 (0.03 to 0.22) | 0.13 (0.10 to 0.17) | 0.07 (-0.08 to 0.22)  | 0.01 (-0.12 to 0.14)   |
| Adult respiratory distress syndrome                              | 5 | 0.14 (0.02 to 0.27) | 0.01 (0.00 to 0.05) | 0.44 (0.38 to 0.51) | 0.14 (0.01 to 0.27)   | -0.30 (-0.44 to -0.16) |
| Alopecia                                                         | 5 | 0.14 (0.02 to 0.27) | 0.01 (0.00 to 0.05) | 0.00 (na)           | 0.13 (0.01 to 0.26)   | 0.14 (0.02 to 0.27)    |
| Primary immunodeficiency disorders                               | 5 | 0.14 (0.02 to 0.27) | 0.00 (na)           | 0.00 (0.00 to 0.01) | 0.14 (0.02 to 0.27)   | 0.14 (0.02 to 0.27)    |
| Seizures                                                         | 4 | 0.12 (0.00 to 0.23) | 0.25 (0.15 to 0.41) | 0.69 (0.61 to 0.77) | -0.13 (-0.30 to 0.04) | -0.58 (-0.72 to -0.44) |
| Menstrual disorders                                              | 4 | 0.12 (0.00 to 0.23) | 0.17 (0.09 to 0.31) | 0.35 (0.29 to 0.40) | -0.05 (-0.21 to 0.10) | -0.23 (-0.36 to -0.10) |
| Miscellaneous bladder and kidney disorders                       | 4 | 0.12 (0.00 to 0.23) | 0.11 (0.03 to 0.37) | 0.03 (0.02 to 0.05) | 0.01 (-0.17 to 0.18)  | 0.08 (-0.03 to 0.20)   |
| Leukocyte disorders                                              | 4 | 0.12 (0.00 to 0.23) | 0.10 (0.04 to 0.23) | 0.19 (0.15 to 0.23) | 0.02 (-0.13 to 0.16)  | -0.07 (-0.20 to 0.05)  |
| Disorders of the nails                                           | 4 | 0.12 (0.00 to 0.23) | 0.08 (0.04 to 0.17) | 0.01 (0.00 to 0.01) | 0.04 (-0.09 to 0.16)  | 0.11 (0.00 to 0.22)    |
| Multiple sclerosis and other demyelinating diseases              | 4 | 0.12 (0.00 to 0.23) | 0.04 (0.01 to 0.09) | 0.12 (0.09 to 0.15) | 0.08 (-0.04 to 0.20)  | -0.01 (-0.12 to 0.11)  |

|                                                     |   |                     |                     |                     |                        |                        |
|-----------------------------------------------------|---|---------------------|---------------------|---------------------|------------------------|------------------------|
| Hypothalamic disorders                              | 4 | 0.12 (0.00 to 0.23) | 0.01 (0.00 to 0.04) | 0.01 (0.00 to 0.02) | 0.11 (-0.01 to 0.22)   | 0.11 (-0.01 to 0.22)   |
| Miscellaneous                                       | 3 | 0.09 (0.00 to 0.18) | 0.90 (0.67 to 1.20) | 0.40 (0.34 to 0.46) | -0.81 (-1.09 to -0.53) | -0.31 (-0.42 to -0.19) |
| Other psychiatric disorders                         | 3 | 0.09 (0.00 to 0.18) | 0.30 (0.21 to 0.44) | 0.19 (0.15 to 0.23) | -0.21 (-0.36 to -0.07) | -0.11 (-0.21 to 0.00)  |
| Uterine disorders                                   | 3 | 0.09 (0.00 to 0.18) | 0.07 (0.04 to 0.15) | 1.02 (0.92 to 1.11) | 0.01 (-0.10 to 0.13)   | -0.93 (-1.07 to -0.79) |
| Diseases of the cornea                              | 3 | 0.09 (0.00 to 0.18) | 0.03 (0.01 to 0.14) | 0.01 (0.00 to 0.01) | 0.06 (-0.05 to 0.17)   | 0.08 (-0.02 to 0.18)   |
| Pigment disorders                                   | 3 | 0.09 (0.00 to 0.18) | 0.02 (0.01 to 0.10) | 0.00 (na)           | 0.06 (-0.04 to 0.17)   | 0.09 (-0.01 to 0.18)   |
| Hypoglycemia not due to insulinoma                  | 3 | 0.09 (0.00 to 0.18) | 0.01 (0.00 to 0.04) | 0.02 (0.01 to 0.03) | 0.08 (-0.02 to 0.17)   | 0.07 (-0.03 to 0.17)   |
| Sexual and gender identity disorders                | 3 | 0.09 (0.00 to 0.18) | 0.01 (0.00 to 0.02) | 0.01 (0.00 to 0.02) | 0.08 (-0.02 to 0.18)   | 0.08 (-0.02 to 0.18)   |
| Miscellaneous dermatology                           | 2 | 0.06 (0.00 to 0.14) | 1.32 (1.05 to 1.65) | 0.17 (0.13 to 0.21) | -1.26 (-1.57 to -0.95) | -0.11 (-0.20 to -0.02) |
| Skin cancer                                         | 2 | 0.06 (0.00 to 0.14) | 0.16 (0.08 to 0.30) | 0.04 (0.02 to 0.06) | -0.10 (-0.23 to 0.03)  | 0.02 (-0.07 to 0.10)   |
| Osteomyelitis                                       | 2 | 0.06 (0.00 to 0.14) | 0.04 (0.01 to 0.24) | 0.20 (0.15 to 0.24) | 0.02 (-0.09 to 0.13)   | -0.14 (-0.23 to -0.05) |
| Personality disorders                               | 2 | 0.06 (0.00 to 0.14) | 0.00 (na)           | 0.02 (0.01 to 0.04) | 0.06 (-0.02 to 0.14)   | 0.03 (-0.05 to 0.11)   |
| Food allergy                                        | 2 | 0.06 (0.00 to 0.14) | 0.00 (na)           | 0.01 (0.00 to 0.02) | 0.06 (-0.02 to 0.14)   | 0.05 (-0.03 to 0.13)   |
| Transfusion medicine (principles and complications) | 2 | 0.06 (0.00 to 0.14) | 0.00 (na)           | 0.00 (na)           | 0.06 (-0.02 to 0.14)   | 0.06 (-0.02 to 0.14)   |

|                                                          |   |                     |                     |                     |                        |                        |
|----------------------------------------------------------|---|---------------------|---------------------|---------------------|------------------------|------------------------|
| Miscellaneous otolaryngology or dental medicine          | 1 | 0.03 (0.00 to 0.09) | 0.28 (0.17 to 0.44) | 0.07 (0.04 to 0.09) | -0.25 (-0.39 to -0.11) | -0.04 (-0.10 to 0.02)  |
| Miscellaneous endocrine disorders                        | 1 | 0.03 (0.00 to 0.09) | 0.19 (0.11 to 0.34) | 0.08 (0.05 to 0.11) | -0.16 (-0.28 to -0.04) | -0.05 (-0.12 to 0.01)  |
| Acne or Rosacea                                          | 1 | 0.03 (0.00 to 0.09) | 0.18 (0.10 to 0.35) | 0.00 (na)           | -0.16 (-0.29 to -0.02) | 0.03 (-0.03 to 0.09)   |
| Soft tissue cancer                                       | 1 | 0.03 (0.00 to 0.09) | 0.05 (0.01 to 0.30) | 0.04 (0.02 to 0.06) | -0.02 (-0.13 to 0.08)  | -0.01 (-0.07 to 0.05)  |
| Photosensitivity dermatoses                              | 1 | 0.03 (0.00 to 0.09) | 0.02 (0.00 to 0.17) | 0.00 (na)           | 0.00 (-0.07 to 0.08)   | 0.03 (-0.03 to 0.09)   |
| Evaluation of common pulmonary symptoms                  | 0 | 0.00 (na)           | 1.07 (0.81 to 1.41) | 0.01 (0.00 to 0.02) | -1.07 (-1.37 to -0.77) | -0.01 (-0.02 to 0.00)  |
| Environmental injury of skin                             | 0 | 0.00 (na)           | 0.70 (0.52 to 0.96) | 0.09 (0.06 to 0.12) | -0.70 (-0.92 to -0.49) | -0.09 (-0.12 to -0.06) |
| Schizophrenia and delusional (paranoid) disorders        | 0 | 0.00 (na)           | 0.11 (0.06 to 0.19) | 1.23 (1.12 to 1.33) | -0.11 (-0.17 to -0.04) | -1.23 (-1.33 to -1.12) |
| Bursitis                                                 | 0 | 0.00 (na)           | 0.06 (0.03 to 0.14) | 0.02 (0.01 to 0.04) | -0.06 (-0.11 to -0.01) | -0.02 (-0.04 to -0.01) |
| Miscellaneous obstetrics or gynecology or women's health | 0 | 0.00 (na)           | 0.05 (0.02 to 0.10) | 0.14 (0.11 to 0.18) | -0.05 (-0.08 to -0.01) | -0.14 (-0.18 to -0.11) |
| Myelodysplastic syndrome                                 | 0 | 0.00 (na)           | 0.05 (0.01 to 0.37) | 0.05 (0.03 to 0.07) | -0.05 (-0.16 to 0.05)  | -0.05 (-0.07 to -0.03) |
| Pressure ulcers or decubiti                              | 0 | 0.00 (na)           | 0.04 (0.01 to 0.09) | 0.15 (0.11 to 0.19) | -0.04 (-0.07 to 0.00)  | -0.15 (-0.19 to -0.11) |

|                                                                 |   |           |                     |                     |                       |                        |
|-----------------------------------------------------------------|---|-----------|---------------------|---------------------|-----------------------|------------------------|
| Other ophthalmologic disorders                                  | 0 | 0.00 (na) | 0.01 (0.00 to 0.08) | 0.01 (0.00 to 0.01) | -0.01 (-0.03 to 0.01) | -0.01 (-0.01 to 0.00)  |
| Diseases of the vulva or external genitalia                     | 0 | 0.00 (na) | 0.01 (0.00 to 0.04) | 0.43 (0.37 to 0.49) | -0.01 (-0.03 to 0.00) | -0.43 (-0.49 to -0.37) |
| Bone tumors                                                     | 0 | 0.00 (na) | 0.00 (0.00 to 0.01) | 0.01 (0.00 to 0.02) | 0.00 (-0.01 to 0.00)  | -0.01 (-0.02 to 0.00)  |
| Cardiac tumors                                                  | 0 | 0.00 (na) | 0.00 (na)           | 0.00 (0.00 to 0.01) | 0.00 (0.00 to 0.00)   | 0.00 (-0.01 to 0.00)   |
| Autoimmune systemic disorders, including IgG4-related disorders | 0 | 0.00 (na) | 0.00 (na)           | 0.03 (0.01 to 0.04) | 0.00 (na)             | -0.03 (-0.04 to -0.01) |
| Rheumatic fever                                                 | 0 | 0.00 (na) | 0.00 (na)           | 0.00 (0.00 to 0.01) | 0.00 (na)             | 0.00 (-0.01 to 0.00)   |
| Porphyrias                                                      | 0 | 0.00 (na) | 0.00 (na)           | 0.00 (0.00 to 0.01) | 0.00 (na)             | 0.00 (-0.01 to 0.00)   |
| Allergic complications of transfusions                          | 0 | 0.00 (na) | 0.00 (na)           | 0.00 (0.00 to 0.01) | 0.00 (na)             | 0.00 (-0.01 to 0.00)   |
| Solitary pulmonary nodule                                       | 0 | 0.00 (na) | 0.02 (0.01 to 0.08) | 0.00 (na)           | -0.02 (-0.05 to 0.00) | 0.00 (na)              |
| Poststreptococcal glomerulonephritis                            | 0 | 0.00 (na) | 0.00 (na)           | 0.00 (na)           | 0.00 (na)             | 0.00 (na)              |
| Polyglandular disorders                                         | 0 | 0.00 (na) | 0.00 (na)           | 0.00 (0.00 to 0.00) | 0.00 (na)             | 0.00 (0.00 to 0.00)    |
| Oncologic complications of HIV infection                        | 0 | 0.00 (na) | 0.00 (na)           | 0.00 (na)           | 0.00 (na)             | 0.00 (na)              |

|                                                                                                                      |    |                     |                     |                     |                     |                     |
|----------------------------------------------------------------------------------------------------------------------|----|---------------------|---------------------|---------------------|---------------------|---------------------|
| Fever of unknown origin (or of too many causes)                                                                      | 0  | 0.00 (na)           |
| Charcot-Marie-Tooth disease                                                                                          | 0  | 0.00 (na)           |
| Bone marrow transplantation (late complications only)                                                                | 0  | 0.00 (na)           |
| <b>Discordant conditions: where the question percentage exceeds the office visits and hospital stays percentages</b> |    |                     |                     |                     |                     |                     |
| Liver disease                                                                                                        | 72 | 2.08 (1.60 to 2.56) | 0.28 (0.16 to 0.47) | 0.57 to 0.72)       | 1.81 (1.31 to 2.30) | 1.44 (0.96 to 1.92) |
| Hematologic malignancies                                                                                             | 68 | 1.96 (1.50 to 2.43) | 0.37 (0.20 to 0.66) | 0.39 (0.33 to 0.45) | 1.60 (1.09 to 2.11) | 1.58 (1.11 to 2.04) |
| Disorders of calcium metabolism and bone                                                                             | 60 | 1.73 (1.30 to 2.17) | 0.25 (0.14 to 0.43) | 0.08 (0.05 to 0.11) | 1.49 (1.03 to 1.94) | 1.65 (1.22 to 2.09) |
| Interstitial lung disease                                                                                            | 53 | 1.53 (1.12 to 1.94) | 0.09 (0.03 to 0.28) | 0.19 (0.15 to 0.23) | 1.45 (1.02 to 1.87) | 1.34 (0.93 to 1.75) |
| Valvular heart disease                                                                                               | 48 | 1.39 (1.00 to 1.78) | 0.20 (0.11 to 0.36) | 0.35 (0.29 to 0.40) | 1.19 (0.78 to 1.60) | 1.04 (0.65 to 1.43) |
| Pericardial disease                                                                                                  | 37 | 1.07 (0.73 to 1.41) | 0.00 (0.00 to 0.02) | 0.05 (0.03 to 0.07) | 1.07 (0.72 to 1.41) | 1.02 (0.67 to 1.36) |

|                                                       |    |                     |                     |                     |                     |                     |
|-------------------------------------------------------|----|---------------------|---------------------|---------------------|---------------------|---------------------|
| Hemolytic anemias                                     | 37 | 1.07 (0.73 to 1.41) | 0.00 (0.00 to 0.03) | 0.04 (0.02 to 0.06) | 1.07 (0.72 to 1.41) | 1.03 (0.68 to 1.37) |
| Endocarditis and other cardiovascular infection       | 37 | 1.07 (0.73 to 1.41) | 0.00 (0.00 to 0.03) | 0.13 (0.10 to 0.17) | 1.06 (0.72 to 1.41) | 0.94 (0.59 to 1.28) |
| Disorders of cerebral function                        | 37 | 1.07 (0.73 to 1.41) | 0.28 (0.19 to 0.41) | 0.46 (0.40 to 0.53) | 0.79 (0.43 to 1.15) | 0.61 (0.26 to 0.95) |
| Vasculitis                                            | 36 | 1.04 (0.70 to 1.38) | 0.01 (0.00 to 0.03) | 0.04 (0.02 to 0.06) | 1.03 (0.69 to 1.37) | 1.00 (0.66 to 1.33) |
| Platelet disorders                                    | 36 | 1.04 (0.70 to 1.38) | 0.11 (0.05 to 0.26) | 0.12 (0.09 to 0.15) | 0.93 (0.58 to 1.28) | 0.92 (0.58 to 1.26) |
| Congenital heart disease in adults                    | 35 | 1.01 (0.68 to 1.34) | 0.05 (0.01 to 0.15) | 0.09 (0.06 to 0.12) | 0.97 (0.63 to 1.30) | 0.92 (0.58 to 1.25) |
| CNS infections                                        | 32 | 0.92 (0.61 to 1.24) | 0.01 (0.00 to 0.08) | 0.16 (0.12 to 0.20) | 0.91 (0.59 to 1.23) | 0.76 (0.44 to 1.08) |
| Miscellaneous oncology                                | 31 | 0.90 (0.58 to 1.21) | 0.07 (0.03 to 0.16) | 0.15 (0.11 to 0.19) | 0.83 (0.51 to 1.15) | 0.74 (0.43 to 1.06) |
| Coagulation factor disorders and thrombotic disorders | 31 | 0.90 (0.58 to 1.21) | 0.10 (0.04 to 0.26) | 0.02 (0.01 to 0.03) | 0.80 (0.47 to 1.13) | 0.88 (0.56 to 1.19) |
| Adrenal disorders                                     | 29 | 0.84 (0.53 to 1.14) | 0.01 (0.00 to 0.07) | 0.05 (0.03 to 0.08) | 0.82 (0.52 to 1.13) | 0.78 (0.48 to 1.09) |
| Systemic sclerosis                                    | 29 | 0.84 (0.53 to 1.14) | 0.08 (0.03 to 0.20) | 0.01 (0.00 to 0.02) | 0.76 (0.44 to 1.07) | 0.83 (0.52 to 1.13) |



|                                                                                                                           |    |                     |                      |                     |                        |                        |
|---------------------------------------------------------------------------------------------------------------------------|----|---------------------|----------------------|---------------------|------------------------|------------------------|
| <b>Discordant conditions: where office visits and hospital stay condition percentages exceed the question percentage</b>  |    |                     |                      |                     |                        |                        |
| Lower respiratory tract infections                                                                                        | 66 | 1.91 (1.45 to 2.36) | 2.97 (2.41 to 3.65)  | 3.94 (3.75 to 4.12) | -1.06 (-1.82 to -0.30) | -2.03 (-2.52 to -1.54) |
| Localized joint syndromes                                                                                                 | 53 | 1.53 (1.12 to 1.94) | 9.13 (8.21 to 10.14) | 2.68 (2.52 to 2.84) | -7.60 (-8.65 to -6.55) | -1.15 (-1.59 to -0.71) |
| Miscellaneous gastroenterology                                                                                            | 21 | 0.61 (0.35 to 0.87) | 2.96 (2.34 to 3.74)  | 2.08 (1.94 to 2.22) | -2.36 (-3.10 to -1.62) | -1.47 (-1.76 to -1.18) |
| Urinary tract infections                                                                                                  | 9  | 0.26 (0.09 to 0.43) | 1.18 (0.95 to 1.48)  | 2.57 (2.42 to 2.73) | -0.92 (-1.24 to -0.61) | -2.31 (-2.54 to -2.08) |
| Osteoarthritis                                                                                                            | 7  | 0.20 (0.05 to 0.35) | 1.03 (0.78 to 1.35)  | 3.92 (3.73 to 4.10) | -0.82 (-1.14 to -0.51) | -3.71 (-3.95 to -3.47) |
| Miscellaneous neurologic disorders                                                                                        | 5  | 0.14 (0.02 to 0.27) | 1.30 (1.02 to 1.65)  | 0.80 (0.71 to 0.89) | -1.15 (-1.49 to -0.82) | -0.66 (-0.81 to -0.50) |
| <b>Discordant conditions: where the question percentage falls between the office visits and hospital stays percentage</b> |    |                     |                      |                     |                        |                        |
| Dysrhythmias or conduction defects                                                                                        | 71 | 2.05 (1.58 to 2.52) | 1.14 (0.88 to 1.47)  | 3.05 (2.89 to 3.22) | 0.91 (0.36 to 1.47)    | -1.00 (-1.50 to -0.50) |

|                                    |    |                     |                     |                     |                        |                        |
|------------------------------------|----|---------------------|---------------------|---------------------|------------------------|------------------------|
| Acute renal failure                | 37 | 1.07 (0.73 to 1.41) | 0.01 (0.00 to 0.03) | 2.12 (1.98 to 2.26) | 1.06 (0.72 to 1.40)    | -1.05 (-1.42 to -0.68) |
| Biliary tract disease              | 37 | 1.07 (0.73 to 1.41) | 0.18 (0.10 to 0.33) | 1.63 (1.50 to 1.75) | 0.89 (0.53 to 1.25)    | -0.56 (-0.92 to -0.19) |
| Lipid disorders                    | 28 | 0.81 (0.51 to 1.11) | 3.75 (3.17 to 4.43) | 0.26 (0.22 to 0.31) | -2.94 (-3.63 to -2.25) | 0.54 (0.24 to 0.85)    |
| Upper respiratory tract infections | 30 | 0.87 (0.56 to 1.18) | 4.65 (3.81 to 5.68) | 0.14 (0.10 to 0.17) | -3.79 (-4.77 to -2.80) | 0.73 (0.42 to 1.04)    |

<sup>a</sup>Question percentage based on examination administered from 2010 to 2013 (number of questions 3,461).

<sup>b</sup>Office visit percentage based on 2010 to 2013 NAMCS data applying nationally representative weights.

<sup>c</sup>Hospital stay percentage based on 2010 NHDS data applying nationally representative weights.

<sup>d</sup>No questions, office visits, or hospital stays observed. Therefore, confidence limits could not be estimated.

**eTable 3. Examination Question Counts, Sample Sizes and National Estimates for Number of Office Visits, and Hospital Stays For 186 Conditions**

| Conditions                                                       | Office visits |                                         | Hospital Stays |                                         | Number of Questions <sup>c</sup> |
|------------------------------------------------------------------|---------------|-----------------------------------------|----------------|-----------------------------------------|----------------------------------|
|                                                                  | Sample, No.   | Population est. % (95% CI) <sup>a</sup> | Sample, No.    | Population est. % (95% CI) <sup>b</sup> |                                  |
| Acne or Rosacea                                                  | 20            | 0.18 (0.10 to 0.35)                     | -              | -                                       | 1                                |
| Acute renal failure                                              | 4             | 0.01 (0.00 to 0.03)                     | 2,123          | 2.12 (1.98 to 2.26)                     | 37                               |
| Adrenal disorders                                                | 2             | 0.01 (0.00 to 0.07)                     | 48             | 0.05 (0.03 to 0.08)                     | 29                               |
| Adult respiratory distress syndrome                              | 1             | 0.01 (0.00 to 0.05)                     | 494            | 0.44 (0.38 to 0.51)                     | 5                                |
| Adverse effects of cancer chemotherapy                           | -             | -                                       | 20             | 0.02 (0.00 to 0.03)                     | 9                                |
| AIDS and HIV infection                                           | 38            | 0.22 (0.10 to 0.46)                     | 164            | 0.16 (0.12 to 0.20)                     | 21                               |
| Allergic complications of transfusions                           | -             | -                                       | 5              | 0.00 (0.00 to 0.01)                     | -                                |
| Alopecia                                                         | 2             | 0.01 (0.00 to 0.05)                     | -              | -                                       | 5                                |
| Anaphylaxis                                                      | 1             | 0.01 (0.00 to 0.04)                     | 19             | 0.02 (0.01 to 0.03)                     | 9                                |
| Anterior pituitary disorders                                     | 6             | 0.03 (0.01 to 0.08)                     | 6              | 0.00 (0.00 to 0.01)                     | 16                               |
| Anxiety disorders                                                | 214           | 1.36 (1.08 to 1.70)                     | 237            | 0.20 (0.16 to 0.25)                     | 17                               |
| Assorted endocrine tumors and endocrine manifestations of tumors | 11            | 0.09 (0.04 to 0.17)                     | 259            | 0.24 (0.19 to 0.28)                     | 5                                |
| Asthma                                                           | 187           | 1.32 (1.04 to 1.67)                     | 1,293          | 1.12 (1.01 to 1.22)                     | 24                               |
| Autoimmune systemic disorders, including IgG4-related disorders  | -             | -                                       | 15             | 0.03 (0.01 to 0.04)                     | -                                |
| Bacteremia or sepsis syndrome                                    | -             | -                                       | 72             | 0.03 (0.01 to 0.05)                     | 18                               |
| Biliary tract disease                                            | 23            | 0.18 (0.10 to 0.33)                     | 1,690          | 1.63 (1.50 to 1.75)                     | 37                               |
| Bone marrow transplantation (late complications only)            | -             | -                                       | -              | -                                       | -                                |
| Bone tumors                                                      | 2             | 0.00 (0.00 to 0.01)                     | 12             | 0.01 (0.00 to 0.02)                     | -                                |
| Breast cancer                                                    | 41            | 0.45 (0.18 to 1.08)                     | 401            | 0.37 (0.32 to 0.43)                     | 34                               |
| Breast disorders                                                 | 32            | 0.25 (0.15 to 0.42)                     | 81             | 0.09 (0.06 to 0.12)                     | 9                                |
| Bronchiectasis                                                   | 2             | 0.00 (0.00 to 0.01)                     | 45             | 0.04 (0.02 to 0.06)                     | 16                               |

|                                                             |       |                      |       |                     |    |
|-------------------------------------------------------------|-------|----------------------|-------|---------------------|----|
| Bursitis                                                    | 12    | 0.06 (0.03 to 0.14)  | 27    | 0.02 (0.01 to 0.04) | -  |
| Cardiac tumors                                              | -     | -                    | 6     | 0.00 (0.00 to 0.01) | -  |
| Cataracts                                                   | 10    | 0.11 (0.05 to 0.24)  | 9     | 0.01 (0.00 to 0.03) | 5  |
| Cerebrovascular disease (without specific diagnosis)        | 62    | 0.48 (0.33 to 0.69)  | 3,696 | 3.62 (3.44 to 3.80) | 20 |
| Charcot-Marie-Tooth disease                                 | -     | -                    | -     | -                   | -  |
| Chronic kidney disease                                      | 46    | 0.35 (0.18 to 0.66)  | 264   | 0.28 (0.23 to 0.33) | 19 |
| CNS infections                                              | 2     | 0.01 (0.00 to 0.08)  | 154   | 0.16 (0.12 to 0.20) | 32 |
| CNS tumors                                                  | 3     | 0.02 (0.01 to 0.11)  | 424   | 0.32 (0.27 to 0.37) | 16 |
| Coagulation factor disorders and thrombotic disorders       | 7     | 0.10 (0.04 to 0.26)  | 30    | 0.02 (0.01 to 0.03) | 31 |
| Congenital heart disease in adults                          | 4     | 0.05 (0.01 to 0.15)  | 81    | 0.09 (0.06 to 0.12) | 35 |
| Congenital lung disease                                     | 2     | 0.02 (0.01 to 0.10)  | 29    | 0.03 (0.02 to 0.05) | 8  |
| Conjunctivitis                                              | 42    | 0.33 (0.21 to 0.52)  | 4     | 0.00 (0.00 to 0.01) | 13 |
| Cranial neuropathy                                          | 9     | 0.07 (0.03 to 0.17)  | 88    | 0.08 (0.05 to 0.11) | 20 |
| Crystal-induced arthropathy                                 | 60    | 0.43 (0.30 to 0.63)  | 83    | 0.07 (0.05 to 0.10) | 27 |
| Dermatitis (Eczemas)                                        | 6     | 0.10 (0.04 to 0.27)  | 37    | 0.04 (0.02 to 0.06) | 12 |
| Diabetes mellitus                                           | 1,222 | 8.69 (7.34 to 10.27) | 2,469 | 2.32 (2.17 to 2.46) | 66 |
| Diseases of muscle and neuromuscular function               | 9     | 0.04 (0.02 to 0.11)  | 138   | 0.16 (0.13 to 0.20) | 15 |
| Diseases of the cornea                                      | 3     | 0.03 (0.01 to 0.14)  | 8     | 0.01 (0.00 to 0.01) | 3  |
| Diseases of the ear                                         | 183   | 1.32 (1.02 to 1.69)  | 227   | 0.19 (0.15 to 0.23) | 23 |
| Diseases of the larynx and airway                           | -     | -                    | -     | -                   | 15 |
| Diseases of the oral cavity, pharynx, and salivary glands   | 42    | 0.29 (0.16 to 0.52)  | 191   | 0.17 (0.13 to 0.21) | 30 |
| Diseases of the vulva or external genitalia                 | 3     | 0.01 (0.00 to 0.04)  | 417   | 0.43 (0.37 to 0.49) | -  |
| Disorders of calcium metabolism and bone                    | 39    | 0.25 (0.14 to 0.43)  | 79    | 0.08 (0.05 to 0.11) | 60 |
| Disorders of cerebral function                              | 55    | 0.28 (0.19 to 0.41)  | 481   | 0.46 (0.40 to 0.53) | 37 |
| Disorders of the nails                                      | 13    | 0.08 (0.04 to 0.17)  | 7     | 0.01 (0.00 to 0.01) | 4  |
| Disorders of the nose and paranasal sinuses                 | 13    | 0.13 (0.06 to 0.27)  | 41    | 0.03 (0.01 to 0.05) | 10 |
| Drug allergy (except drug-induced urticaria and angioedema) | 4     | 0.06 (0.01 to 0.22)  | 12    | 0.01 (0.00 to 0.02) | 9  |

|                                                 |       |                        |       |                     |    |
|-------------------------------------------------|-------|------------------------|-------|---------------------|----|
| Dysrhythmias or conduction defects              | 190   | 1.14 (0.88 to 1.47)    | 3,415 | 3.05 (2.89 to 3.22) | 71 |
| Eating disorders (not including obesity)        | 50    | 0.41 (0.14 to 1.17)    | 12    | 0.02 (0.00 to 0.03) | 6  |
| Endocarditis and other cardiovascular infection | 1     | 0.00 (0.00 to 0.03)    | 129   | 0.13 (0.10 to 0.17) | 37 |
| Enteric infections                              | 20    | 0.16 (0.08 to 0.29)    | 792   | 0.74 (0.66 to 0.83) | 30 |
| Environmental injury of skin                    | 83    | 0.70 (0.52 to 0.96)    | 64    | 0.09 (0.06 to 0.12) | -  |
| Esophageal disease                              | 173   | 1.34 (1.07 to 1.68)    | 685   | 0.64 (0.57 to 0.72) | 40 |
| Evaluation of common pulmonary symptoms         | 160   | 1.07 (0.81 to 1.41)    | 4     | 0.01 (0.00 to 0.02) | -  |
| Factitious disorders                            | -     | -                      | 3     | 0.00 (0.00 to 0.01) | 7  |
| Fever of unknown origin (or of too many causes) | -     | -                      | -     | -                   | -  |
| Food allergy                                    | -     | -                      | 11    | 0.01 (0.00 to 0.02) | 2  |
| Gastrointestinal or hepatic cancer              | 31    | 0.35 (0.16 to 0.75)    | 1,279 | 1.16 (1.06 to 1.26) | 42 |
| Glaucoma                                        | 6     | 0.05 (0.02 to 0.15)    | 7     | 0.00 (0.00 to 0.01) | 6  |
| Glomerular disorders                            | -     | -                      | 31    | 0.03 (0.01 to 0.04) | 22 |
| Gynecologic cancer                              | 5     | 0.01 (0.01 to 0.04)    | 470   | 0.45 (0.38 to 0.51) | 12 |
| Headache                                        | 147   | 0.89 (0.72 to 1.11)    | 295   | 0.27 (0.22 to 0.32) | 5  |
| Hematologic malignancies                        | 45    | 0.37 (0.20 to 0.66)    | 425   | 0.39 (0.33 to 0.45) | 68 |
| Hemoglobinopathies and thalassemias             | 3     | 0.02 (0.00 to 0.06)    | 334   | 0.26 (0.21 to 0.30) | 26 |
| Hemolytic anemias                               | 1     | 0.00 (0.00 to 0.03)    | 44    | 0.04 (0.02 to 0.06) | 37 |
| Hepatic infections                              | 23    | 0.13 (0.07 to 0.24)    | 163   | 0.15 (0.11 to 0.19) | 9  |
| Hypertension                                    | 2,064 | 13.87 (12.52 to 15.35) | 2,112 | 1.84 (1.71 to 1.97) | 66 |
| Hypoglycemia not due to insulinoma              | 3     | 0.01 (0.00 to 0.04)    | 27    | 0.02 (0.01 to 0.03) | 3  |
| Hypoproliferative anemias                       | 132   | 0.98 (0.75 to 1.27)    | 1,111 | 1.03 (0.93 to 1.13) | 36 |
| Hypothalamic disorders                          | 2     | 0.01 (0.00 to 0.04)    | 2     | 0.01 (0.00 to 0.02) | 4  |
| Infectious arthritis                            | 1     | 0.00 (0.00 to 0.01)    | 95    | 0.10 (0.07 to 0.13) | 15 |
| Interstitial lung disease                       | 10    | 0.09 (0.03 to 0.28)    | 222   | 0.19 (0.15 to 0.23) | 53 |
| Ischemic heart disease                          | 371   | 2.52 (1.95 to 3.25)    | 9,107 | 7.94 (7.68 to 8.20) | 78 |
| Leukocyte disorders                             | 9     | 0.10 (0.04 to 0.23)    | 208   | 0.19 (0.15 to 0.23) | 4  |
| Lipid disorders                                 | 541   | 3.75 (3.17 to 4.43)    | 221   | 0.26 (0.22 to 0.31) | 28 |
| Liver disease                                   | 33    | 0.28 (0.16 to 0.47)    | 701   | 0.64 (0.57 to 0.72) | 72 |
| Localized joint syndromes                       | 1,288 | 9.13 (8.21 to 10.14)   | 2,829 | 2.68 (2.52 to 2.84) | 53 |

|                                                          |     |                     |       |                     |    |
|----------------------------------------------------------|-----|---------------------|-------|---------------------|----|
| Lower respiratory tract infections                       | 363 | 2.97 (2.41 to 3.65) | 3,974 | 3.94 (3.75 to 4.12) | 66 |
| Lung cancer                                              | 24  | 0.28 (0.11 to 0.69) | 709   | 0.67 (0.59 to 0.75) | 32 |
| Management of ventilators                                | -   | -                   | 2     | 0.01 (0.00 to 0.01) | 10 |
| Menopause: Management, risks, and benefits of therapy    | 19  | 0.11 (0.05 to 0.25) | 32    | 0.03 (0.01 to 0.05) | 11 |
| Menstrual disorders                                      | 21  | 0.17 (0.09 to 0.31) | 368   | 0.35 (0.29 to 0.40) | 4  |
| Metabolic and other bone disease                         | 70  | 0.48 (0.32 to 0.71) | 579   | 0.57 (0.49 to 0.64) | 5  |
| Miscellaneous                                            | 146 | 0.90 (0.67 to 1.20) | 335   | 0.40 (0.34 to 0.46) | 3  |
| Miscellaneous allergy or immunology                      | 27  | 0.21 (0.06 to 0.69) | 7     | 0.01 (0.00 to 0.01) | 18 |
| Miscellaneous bladder and kidney disorders               | 7   | 0.11 (0.03 to 0.37) | 67    | 0.03 (0.02 to 0.05) | 4  |
| Miscellaneous cardiovascular disease                     | 54  | 0.40 (0.27 to 0.61) | 62    | 0.05 (0.03 to 0.07) | 28 |
| Miscellaneous dermatology                                | 196 | 1.32 (1.05 to 1.65) | 196   | 0.17 (0.13 to 0.21) | 2  |
| Miscellaneous endocrine disorders                        | 27  | 0.19 (0.11 to 0.34) | 99    | 0.08 (0.05 to 0.11) | 1  |
| Miscellaneous gastroenterology                           | 385 | 2.96 (2.34 to 3.74) | 2,084 | 2.08 (1.94 to 2.22) | 21 |
| Miscellaneous hematology disorders                       | 11  | 0.16 (0.06 to 0.43) | 56    | 0.04 (0.02 to 0.06) | 11 |
| Miscellaneous infectious disease disorders               | 99  | 0.76 (0.58 to 0.99) | 82    | 0.07 (0.05 to 0.10) | 9  |
| Miscellaneous neurologic disorders                       | 187 | 1.30 (1.02 to 1.65) | 859   | 0.80 (0.71 to 0.89) | 5  |
| Miscellaneous obstetrics or gynecology or women's health | 11  | 0.05 (0.02 to 0.10) | 147   | 0.14 (0.11 to 0.18) | -  |
| Miscellaneous oncology                                   | 11  | 0.07 (0.03 to 0.16) | 157   | 0.15 (0.11 to 0.19) | 31 |
| Miscellaneous ophthalmologic disorders                   | 39  | 0.32 (0.20 to 0.51) | 82    | 0.09 (0.06 to 0.12) | 10 |
| Miscellaneous otolaryngology or dental medicine          | 52  | 0.28 (0.17 to 0.44) | 42    | 0.07 (0.04 to 0.09) | 1  |
| Miscellaneous pulmonary disorders                        | 21  | 0.22 (0.12 to 0.42) | 1,088 | 1.08 (0.98 to 1.18) | 22 |
| Miscellaneous rheumatology or orthopedics                | 44  | 0.26 (0.17 to 0.41) | 330   | 0.27 (0.22 to 0.32) | 10 |
| Mood disorders                                           | 248 | 1.61 (1.24 to 2.07) | 4,122 | 2.93 (2.77 to 3.10) | 39 |
| Movement disorders                                       | 36  | 0.28 (0.16 to 0.49) | 165   | 0.14 (0.10 to 0.18) | 9  |

|                                                         |     |                     |       |                     |    |
|---------------------------------------------------------|-----|---------------------|-------|---------------------|----|
| Multiple sclerosis and other demyelinating diseases     | 8   | 0.04 (0.01 to 0.09) | 131   | 0.12 (0.09 to 0.15) | 4  |
| Myelodysplastic syndrome                                | 3   | 0.05 (0.01 to 0.37) | 52    | 0.05 (0.03 to 0.07) | -  |
| Myeloproliferative disorders                            | 4   | 0.04 (0.01 to 0.13) | 32    | 0.03 (0.01 to 0.05) | 20 |
| Myocardial disease                                      | 25  | 0.19 (0.11 to 0.33) | 1,164 | 1.04 (0.94 to 1.14) | 47 |
| Neoplasms of the head and neck                          | 9   | 0.08 (0.03 to 0.22) | 118   | 0.13 (0.10 to 0.17) | 5  |
| Nephrolithiasis                                         | 24  | 0.18 (0.10 to 0.32) | 662   | 0.60 (0.52 to 0.67) | 14 |
| Nerve root syndromes or Mechanical lesions of the spine | 54  | 0.35 (0.24 to 0.53) | 522   | 0.45 (0.39 to 0.52) | 5  |
| Neuro-ophthalmology (not retinal)                       | 1   | 0.00 (0.00 to 0.03) | 22    | 0.02 (0.01 to 0.04) | 17 |
| Nodules and tumors of the skin                          | 32  | 0.17 (0.11 to 0.27) | 16    | 0.02 (0.01 to 0.04) | 16 |
| Nutritional disorders                                   | 141 | 1.49 (0.75 to 2.92) | 728   | 0.71 (0.63 to 0.79) | 8  |
| Obstructive airway diseases                             | 295 | 2.11 (1.72 to 2.57) | 2,680 | 2.54 (2.38 to 2.69) | 75 |
| Occupational and environmental lung disease             | 3   | 0.02 (0.00 to 0.07) | 797   | 0.79 (0.70 to 0.88) | 23 |
| Oncologic complications of HIV infection                | -   | -                   | -     | -                   | -  |
| Osteoarthritis                                          | 152 | 1.03 (0.78 to 1.35) | 4,505 | 3.92 (3.73 to 4.10) | 7  |
| Osteomyelitis                                           | 5   | 0.04 (0.01 to 0.24) | 204   | 0.20 (0.15 to 0.24) | 2  |
| Other kidney disorders                                  | 32  | 0.31 (0.19 to 0.49) | 238   | 0.25 (0.20 to 0.29) | 16 |
| Other ophthalmologic disorders                          | 1   | 0.01 (0.00 to 0.08) | 7     | 0.01 (0.00 to 0.01) | -  |
| Other primary neurologic disorders                      | 49  | 0.43 (0.28 to 0.64) | 1,874 | 2.09 (1.95 to 2.23) | 17 |
| Other primary rheumatic disorders                       | 212 | 1.52 (1.22 to 1.89) | 277   | 0.27 (0.22 to 0.32) | 33 |
| Other psychiatric disorders                             | 58  | 0.30 (0.21 to 0.44) | 235   | 0.19 (0.15 to 0.23) | 3  |
| Other urology                                           | 70  | 0.64 (0.42 to 0.97) | 220   | 0.23 (0.19 to 0.28) | 10 |
| Ovarian disorders or Female reproductive health         | 18  | 0.13 (0.07 to 0.26) | 381   | 0.35 (0.30 to 0.41) | 22 |
| Pancreatic disease                                      | 18  | 0.30 (0.09 to 0.99) | 1,231 | 1.11 (1.01 to 1.21) | 19 |
| Papulosquamous dermatoses                               | 13  | 0.06 (0.03 to 0.11) | 1     | 0.00 (0.00 to 0.00) | 17 |
| Pericardial disease                                     | 1   | 0.00 (0.00 to 0.02) | 71    | 0.05 (0.03 to 0.07) | 37 |
| Peripheral neuropathy                                   | 28  | 0.22 (0.13 to 0.37) | 72    | 0.09 (0.06 to 0.12) | 19 |
| Personality disorders                                   | -   | -                   | 27    | 0.02 (0.01 to 0.04) | 2  |
| Photosensitivity dermatoses                             | 1   | 0.02 (0.00 to 0.17) | -     | -                   | 1  |
| Pigment disorders                                       | 3   | 0.02 (0.01 to 0.10) | -     | -                   | 3  |

|                                                                     |     |                     |       |                     |    |
|---------------------------------------------------------------------|-----|---------------------|-------|---------------------|----|
| Platelet disorders                                                  | 10  | 0.11 (0.05 to 0.26) | 135   | 0.12 (0.09 to 0.15) | 36 |
| Pleural disease                                                     | 6   | 0.02 (0.01 to 0.07) | 572   | 0.51 (0.44 to 0.58) | 27 |
| Polyglandular disorders                                             | -   | -                   | 1     | 0.00 (0.00 to 0.00) | -  |
| Porphyrias                                                          | -   | -                   | 3     | 0.00 (0.00 to 0.01) | -  |
| Posterior pituitary and water metabolism                            | 6   | 0.03 (0.01 to 0.09) | 769   | 0.78 (0.69 to 0.86) | 8  |
| Poststreptococcal glomerulonephritis                                | -   | -                   | -     | -                   | -  |
| Pregnancy                                                           | 58  | 0.28 (0.15 to 0.52) | 1,520 | 1.69 (1.56 to 1.81) | 31 |
| Preoperative consultation                                           | 72  | 0.61 (0.42 to 0.89) | -     | -                   | 18 |
| Pressure ulcers or decubiti                                         | 7   | 0.04 (0.01 to 0.09) | 164   | 0.15 (0.11 to 0.19) | -  |
| Primary immunodeficiency disorders                                  | -   | 0.00 (0.00 to 0.00) | 1     | 0.00 (0.00 to 0.01) | 5  |
| Procedure- and device-associated infections                         | 10  | 0.07 (0.02 to 0.28) | 2,275 | 2.14 (2.00 to 2.28) | 15 |
| Prostate disorders                                                  | 34  | 0.18 (0.10 to 0.31) | 320   | 0.26 (0.21 to 0.31) | 15 |
| Pulmonary vascular disease                                          | 16  | 0.11 (0.06 to 0.21) | 841   | 0.85 (0.76 to 0.94) | 40 |
| Retinal disease                                                     | 3   | 0.06 (0.02 to 0.22) | 30    | 0.02 (0.01 to 0.04) | 21 |
| Rheumatic fever                                                     | -   | 0.00 (0.00 to 0.00) | 2     | 0.00 (0.00 to 0.01) | -  |
| Rheumatoid arthritis                                                | 27  | 0.14 (0.08 to 0.24) | 75    | 0.06 (0.03 to 0.08) | 21 |
| Rhinitis or Sinusitis or Conjunctivitis                             | 124 | 0.97 (0.75 to 1.26) | 3     | 0.01 (0.00 to 0.02) | 21 |
| Schizophrenia and delusional (paranoid) disorders                   | 21  | 0.11 (0.06 to 0.19) | 1,874 | 1.23 (1.12 to 1.33) | -  |
| Seizures                                                            | 35  | 0.25 (0.15 to 0.41) | 759   | 0.69 (0.61 to 0.77) | 4  |
| Sexual and gender identity disorders                                | 3   | 0.01 (0.00 to 0.02) | 2     | 0.01 (0.00 to 0.02) | 3  |
| Sexually transmitted diseases and infections of reproductive organs | 8   | 0.02 (0.01 to 0.05) | 7     | 0.01 (0.00 to 0.01) | 20 |
| Skin and soft tissue infections                                     | 228 | 1.73 (1.40 to 2.14) | 2,313 | 2.10 (1.96 to 2.23) | 35 |
| Skin cancer                                                         | 16  | 0.16 (0.08 to 0.30) | 41    | 0.04 (0.02 to 0.06) | 2  |
| Sleep medicine                                                      | 120 | 0.64 (0.44 to 0.94) | 47    | 0.05 (0.03 to 0.07) | 32 |
| Small intestinal disease & Colonic and anorectal disease            | 235 | 2.28 (1.31 to 3.96) | 4,688 | 4.29 (4.09 to 4.48) | 87 |
| Soft tissue cancer                                                  | 4   | 0.05 (0.01 to 0.30) | 47    | 0.04 (0.02 to 0.06) | 1  |
| Solitary pulmonary nodule                                           | 3   | 0.02 (0.01 to 0.08) | -     | -                   | -  |
| Somatoform disorders                                                | 1   | 0.01 (0.00 to 0.08) | 50    | 0.04 (0.02 to 0.06) | 21 |
| Specific causative organisms                                        | 109 | 0.77 (0.56 to 1.06) | 3,465 | 3.20 (3.03 to 3.37) | 41 |



|                                                     |     |                     |       |                     |    |
|-----------------------------------------------------|-----|---------------------|-------|---------------------|----|
| Spondyloarthropathies                               | 3   | 0.01 (0.00 to 0.02) | 10    | 0.01 (0.00 to 0.01) | 19 |
| Sports injuries or trauma                           | 41  | 0.28 (0.18 to 0.45) | 2,532 | 2.49 (2.34 to 2.64) | 5  |
| Stomach or duodenum                                 | 79  | 0.65 (0.44 to 0.97) | 1,434 | 1.24 (1.13 to 1.35) | 26 |
| Substance use disorder                              | 71  | 0.61 (0.22 to 1.71) | 2,060 | 1.69 (1.57 to 1.81) | 16 |
| Syncope                                             | 28  | 0.17 (0.09 to 0.31) | 344   | 0.30 (0.25 to 0.35) | 25 |
| Systemic lupus erythematosus                        | 10  | 0.04 (0.02 to 0.09) | 79    | 0.05 (0.03 to 0.07) | 23 |
| Systemic sclerosis                                  | 12  | 0.08 (0.03 to 0.20) | 14    | 0.01 (0.00 to 0.02) | 29 |
| Testes or Male reproductive health                  | 55  | 0.41 (0.26 to 0.66) | 29    | 0.02 (0.00 to 0.03) | 7  |
| Thyroid disorders                                   | 227 | 1.39 (1.15 to 1.69) | 259   | 0.28 (0.23 to 0.33) | 45 |
| Transfusion medicine (principles and complications) | -   | -                   | -     | -                   | 2  |
| Tubulointerstitial disease                          | -   | -                   | 5     | 0.00 (0.00 to 0.01) | 22 |
| Undiagnosed gastrointestinal hemorrhage             | 17  | 0.14 (0.06 to 0.31) | 800   | 0.78 (0.70 to 0.87) | 13 |
| Upper respiratory tract infections                  | 532 | 4.65 (3.81 to 5.68) | 137   | 0.14 (0.10 to 0.17) | 30 |
| Urinary incontinence                                | 41  | 0.17 (0.11 to 0.26) | 1     | 0.00 (0.00 to 0.00) | 8  |
| Urinary tract infections                            | 165 | 1.18 (0.95 to 1.48) | 2,611 | 2.57 (2.42 to 2.73) | 9  |
| Urologic cancer                                     | 28  | 0.26 (0.15 to 0.47) | 785   | 0.66 (0.58 to 0.74) | 30 |
| Urticaria and angioedema                            | 22  | 0.14 (0.07 to 0.29) | 71    | 0.07 (0.04 to 0.09) | 10 |
| Uterine disorders                                   | 14  | 0.07 (0.04 to 0.15) | 902   | 1.02 (0.92 to 1.11) | 3  |
| Uveitis                                             | -   | -                   | 3     | 0.00 (0.00 to 0.01) | 10 |
| Vaginal disorders (not vulvovaginitis)              | 9   | 0.06 (0.02 to 0.19) | 17    | 0.02 (0.01 to 0.04) | 10 |
| Valvular heart disease                              | 21  | 0.20 (0.11 to 0.36) | 403   | 0.35 (0.29 to 0.40) | 48 |
| Vascular dermatoses                                 | -   | -                   | -     | -                   | 13 |
| Vascular disease                                    | 114 | 0.82 (0.54 to 1.25) | 2,293 | 2.02 (1.88 to 2.16) | 56 |
| Vasculitis                                          | 2   | 0.01 (0.00 to 0.03) | 53    | 0.04 (0.02 to 0.06) | 36 |
| Vesiculobullous dermatoses                          | 2   | 0.01 (0.00 to 0.07) | 5     | 0.00 (0.00 to 0.01) | 10 |
| Water and electrolyte balance                       | 6   | 0.02 (0.01 to 0.04) | 926   | 0.94 (0.85 to 1.04) | 24 |

<sup>a</sup>Office visit percentage based on 2010 to 2013 NAMCS data applying nationally representative weights.

<sup>b</sup>Hospital stay percentage based on 2010 NHDS data applying nationally representative weights.

<sup>c</sup>Question percentage based on examination administered from 2010 to 2013 (number of questions 3,461).

**eTable 4. Discordance Sensitivity Results**

| Concordance Sensitivity                                          | Questions, % (95% CI) <sup>a</sup> | Visit, % (95% CI) <sup>b</sup> | Hospital discharge, % (95% CI) <sup>c</sup> |
|------------------------------------------------------------------|------------------------------------|--------------------------------|---------------------------------------------|
| Base Criteria                                                    | 30.97 (29.43 to 32.51)             | 30.20 (28.60 to 31.90)         | 26.18 (25.75 to 26.60)                      |
| Difference criteria:<br>Upper 95% CI Bounds                      | 25.25 (23.81 to 26.70)             | 24.77 (23.24 to 26.37)         | 19.82 (19.59 to 20.05)                      |
| Difference criteria:<br>Lower 95% CI Bounds                      | 32.97 (31.40 to 34.53)             | 33.43 (31.66 to 35.26)         | 29.23 (28.97 to 29.50)                      |
| Care setting                                                     | 34.01 (32.47 to 35.55)             | 30.20 (28.60 to 31.90)         | 26.18 (25.75 to 26.60)                      |
| National Hospital Discharge<br>Survey periodicity<br>sensitivity | 30.97 (29.43 to 32.51)             | 30.20 (28.6 to 31.90)          | 25.77 (25.51 to 26.02) <sup>d</sup>         |
| Non-surgical stay                                                | 27.59 (26.10 to 29.08)             | 21.57 (19.81 to 23.43)         | 21.25 (20.79 to 21.71) <sup>e</sup>         |

<sup>a</sup>Question percentage based on examination administered from 2010 to 2013 (number of questions 3,461).

<sup>b</sup>Office visit percentage based on 2010 to 2013 NAMCS data applying nationally representative weights.

<sup>c</sup>Hospital stay percentage based on 2010 NHDS data applying nationally representative weights.

<sup>d</sup>Hospital stay percentage based on 2007 to 2010 NHDS data.

<sup>e</sup>Hospital stay percentage based on 2010 NHDS data excluding invasive surgical procedures.
